# Supplementary material for: ATLID Cloud Climate Product
Source: Copernicus journal article supplement (doi:10.5194/egusphere-2022-1187), 2022-11-18
Supplement: Supplementary file [file egusphere-2022-1187-RC2-supplement.pdf]

Review of “ATLID Cloud Climate Product”  
 by A. G. Feofilov, H. Chepfer, V. Noël, and F. Szczap  
 Reviewed by Mark Vaughan (mark.a.vaughan@nasa.gov)

As indicated by the manuscript title, the authors are proposing the creation of a multi-decade lidar-derived cloud climate record that fuses 16+ years of CALIOP observations with new measurements to be acquired during the upcoming EarthCARE mission. To do this, they have adapted the GOCCP layer detection algorithm, designed for CALIOP’s elastic backscatter measurements, for use with the high spectral resolution lidar (HSRL) data that will be acquired by ATLID. With this scheme they intend to produce two new products: a short-term climate record that will be used to “evaluate the description of cloud processes in climate models, beyond what is already done with existing space lidar observations” and a long-term record “to evaluate the cloud climate variability predicted by climate models”. Part 1 of the manuscript describes the methods that will be used for combining the CALIOP and ATLID measurements. Part 2 discusses what sorts of things we might expect to learn by probing this extended data record.

The authors have quite obviously put a huge amount of work into this manuscript and I expect it to eventually make a valuable contribution to the scientific literature on cloud trends in a changing climate. Unfortunately, in my opinion it is not yet ready for publication, as details essential for fully evaluating the comparisons presented are too often elided. My primary concerns are as follows.

- a. The authors do not enumerate the uncertainties inherent in the ATLID measurement technique, nor do they address the potential effects of these uncertainties in their cloud detection scheme. For example, assuming a perfect measurement system, deriving 532 nm attenuated scattering ratios (i.e., the authors’ equation (5)) from ATLID’s 355 nm HSRL measurements can be done as follows:

$$\begin{aligned} \text{SR}(532, z) &= \left( 1 + R_m(z) \left( \frac{\text{Eq. 2}(355, z)}{\text{Eq. 3}(355, z)} \right) \right) \left( \frac{\text{Eq. 3}(355, z)}{\text{Eq. 4}(355, z)} \right) \\ &= \left( 1 + R_{p,532}(z) \right) \exp \left( -2 \int_{z_{\text{sat}}}^z \eta \alpha_{p,355}(z') dz' \right) \end{aligned}$$

where  $R_m(z) = \frac{\beta_{m,355}(z)}{\beta_{m,532}(z)} \approx 5.33$ . Per item b. below, this development assumes that  $\beta_{p,355}(z) = \beta_{p,532}(z)$  and  $\alpha_{p,355}(z) = \alpha_{p,532}(z)$ . Potential biases in this formulation will come from imperfect knowledge of

1. the electro-optic gains for the HSRL molecular and particulate channels and the perpendicular channel;
2. the particulate vs. molecular signal crosstalk in the two HSRL channels (e.g., the interferometer contrast ratio, as in Burton et al., 2018; based on table 1 in do Carmo et al., 2021, I’m guessing the ATLID contrast ratio is  $\sim 3.4$ ); and

3. the parallel vs. perpendicular signal crosstalk in the perpendicular channel and the HSRL particulate channel.

At this stage in the development of ATLID, I would assume that reasonably accurate estimates of these calibration coefficients and crosstalk parameters have been developed by the instrument and algorithm engineers. With these values, presumably the authors could develop a rough order of magnitude estimate of potential detection biases.

- b. Some fundamental assumptions are not identified. In particular, the transformation of the ATLID attenuated scattering ratios from 355 nm to 532 nm requires that both the cloud backscatter and extinction coefficients are spectrally independent. Beyerle et al. (2001) suggest that this is generally true for cirrus. On the other hand, Voudouri et al. (2020) offer evidence to the contrary.
- c. Related to the above, the authors do not make a convincing case for converting ATLID 355 nm measurements to their approximate realizations at 532 nm. Assuming the electro-optic gains (AKA, calibration coefficients) are accurately known for all three channels, one can derive the authors' equation (1) at 355 nm by summing equation (2), equation (3), and the perpendicular channel analog of equation (3). This approach obviates the need for accurate knowledge of the crosstalk parameters. (My guess is that imprecise knowledge of crosstalk (i.e., in computing the ratio between equation (2) and equation (3)) could be the dominant source of detection uncertainty.) Invoking the assumption in item b. (i.e., that  $\beta_{p,355}(z) = \beta_{p,532}(z)$ ), one can readily derive the 355 nm threshold that is equivalent to the GOCCP threshold of 5 used at 532 nm ( $1 + 4/5.33 \approx 1.75$ ).

(I note that CALIOP layer detection can also be biased by imprecise knowledge of calibration coefficients; e.g., underestimating the 532 nm calibration coefficient leads to increases in false positive detections.)

- d. On several occasions the authors assert that ATLID signals will suffer much less than CALIOP from solar background noise. What's missing from the manuscript are explanations for this improved daytime performance and how the simulated cloud fields were converted to lidar measurements. I'd very much like to see Section 3 expanded to include
  - high level descriptions of the differences between the ATLID and CALIOP detectors
  - some comments on how synthetic noise is generated for each instrument (note: per Liu et al., 2006, Poisson-distributed noise is not quite correct for the "analog-mode APD and PMT detectors" used by CALIOP.)
  - an accounting of the differences in solar background rejection between ATLID and CALIOP
  - diagnostic comparisons of simulated CALIOP signals and the real thing; one informative example would be the SNR computed for 1500 km along track in clear skies between 19 km and 20 km.

On last idle question about noise characteristics: will ATLID be affected by the South Atlantic Anomaly in the same way that CALIOP is? (Hunt et al., 2009)

- e. Lots of work obviously went into constructing the simulated cloud data. I just wish I had a handy dandy metric for evaluating the representativeness of these simulations with respect to things a lidar directly measures (e.g., attenuated backscatter coefficients and volume

depolarization ratios as functions of temperature/altitude). How well do these simulations capture the natural variability of cloud backscatter? What is the distribution of optical depths for stratocumulus clouds? What is the lower limit of the attenuated backscatter coefficients within the simulated cirrus? And how do these characteristics of the simulated data sets compare to real-world values harvested from CALIOP measurements?

f. Figures 4 and 5

Comparisons of the ATLID and CALIOP measurements shown in these figures are more difficult to interpret than one would like simply because they show two different quantities: attenuated *particulate* backscatter for ATLID and attenuated *total* backscatter for CALIOP. I believe these plots would be much more useful to readers if they showed apples-to-apples comparisons of the signals that are actually used the detection algorithm; i.e., either 532 nm attenuated scattering ratios or (perhaps better?) 532 nm attenuated backscatter coefficients. I also believe they would be much more informative if the colors were rendered using a log scale.

Here's a specific example illustrating both points. Line 365 says, "Another remarkable feature shown in this plot is higher daytime noise for CALIOP (Fig. 5bd)". First, I think the CALIOP day–night differences might be better illustrated by drawing the readers' attention to panels 5c and 5d (i.e., not 5b and 5d) and pointing out the clearly lower SNR in panel 5d, which is most readily visible in the molecular atmosphere above the cloud. But second and more important, this same kind of day–night comparison will not be useful for ATLID, simply because the ATLID panels (5g and 5h) show attenuated *particulate* backscatter. Since there is no molecular contribution to the ATLID signal, the SNR is close to zero in both cases, irrespective of the magnitude of the noise. This fact, combined with the very dark colors used at the low end of the SNR scale, make it exceedingly difficult to distinguish any changes in the ATLID day versus night noise levels. (Because the in-cloud signals saturate the high end of the color scale in all eight panels, I cannot discern any meaningful day versus night or CALIOP versus ATLID SNR differences. Perhaps readers with more acute vision will do better.)

In addition to the remarks above, I am also attaching an annotated version of the manuscript into which I have inserted a fairly large number of additional comments, questions, and suggestions. These notes both amplify some of the concerns mentioned above and surface a few new, perhaps more detail-oriented issues. Please accept my apologies in advance for any repetition that may be encountered while perusing the annotated manuscript.

## References

- Beyerle, G. et al., 2001, A lidar and backscatter sonde measurement campaign at Table Mountain during February–March 1997: Observations of cirrus clouds, *J. Atmos. Sci.*, **58**, 1275–1287, [https://doi.org/10.1175/1520-0469\(2001\)058<1275:ALABSM>2.0.CO;2](https://doi.org/10.1175/1520-0469(2001)058<1275:ALABSM>2.0.CO;2).
- Burton, S. P. et al., 2018: Calibration of a high spectral resolution lidar using a Michelson interferometer, with data examples from ORACLES, *Appl. Opt.*, **57**, 6061–6075, <https://doi.org/10.1364/AO.57.006061>.

- do Carmo, J. P. et al., 2021: ATmospheric LIDar (ATLID): Pre-Launch Testing and Calibration of the European Space Agency Instrument That Will Measure Aerosols and Thin Clouds in the Atmosphere, *Atmosphere*, **12**, 76, <https://doi.org/10.3390/atmos12010076>.
- Hunt, W. H. et al., 2009: CALIPSO Lidar Description and Performance Assessment, *J. Atmos. Oceanic Technol.*, **26**, 1214–1228, <https://doi.org/10.1175/2009JTECHA1223.1>.
- Leahy, L. V. et al., 2012: “On the nature and extent of optically thin marine low clouds”, *J. Geophys. Res.*, **117**, D22201, <https://doi.org/10.1029/2012JD017929>.
- Liu, Z. et al., 2006: Estimating Random Errors Due to Shot Noise in Backscatter Lidar Observations, *Appl. Opt.*, **45**, 4437–4447, <https://doi.org/10.1364/AO.45.004437>.
- Voudouri, K. A. et al., 2020: Variability in cirrus cloud properties using a PollyXT Raman lidar over high and tropical latitudes, *Atmos. Chem. Phys.*, **20**, 4427–4444, <https://doi.org/10.5194/acp-20-4427-2020>.

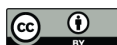

## ATLID Cloud Climate Product

Artem G. Feofilov<sup>1</sup>, H el ene Chepfer<sup>1</sup>, Vincent No el<sup>2</sup>, and Frederic Szczap<sup>3</sup>

<sup>1</sup>LMD/IPSL, Sorbonne Universit e, UPMC Univ Paris 06, CNRS,  cole Polytechnique, Paris, France

<sup>2</sup>Laboratoire d'A rologie (LAERO), CNRS/UPS, Observatoire Midi-Pyr en es, Toulouse, France

5 <sup>3</sup>Laboratoire de M t eorologie Physique, UMR6016, CNRS, Aubi re, France

Correspondence to: Artem G. Feofilov ([artem.feofilov@lmd.polytechnique.fr](mailto:artem.feofilov@lmd.polytechnique.fr))

### Abstract

Despite significant advances in atmospheric measurements and modeling, clouds response to human-induced climate warming remains the largest source of uncertainty in model predictions of climate. Documenting how the cloud detailed vertical structure, the cloud cover and opacity evolve on a global scale over several decades is a necessary step towards understanding and predicting the cloud response to climate warming. Among satellite-based remote sensing techniques, active sounding plays a special role, owing to its high vertical and horizontal resolution and high sensitivity. The launch of Cloud-Aerosol Lidar and Infrared Pathfinder Satellite Observation (CALIPSO) in 2006 started the era of space-borne optical active sounding of the Earth's atmosphere, which continued with the CATS (Cloud-Aerosol Transport System) lidar on-board ISS in 2015 and the Atmospheric Laser Doppler INstrument (ALADIN) lidar on-board Aeolus in 2018. The next important step is the ATmospheric LIDar (ATLID) instrument from the EarthCARE mission expected to launch in 2023. With ATLID, the scientific community will continue receiving invaluable vertically resolved information of atmospheric optical properties needed for the estimation of cloud occurrence frequency, thickness, and height.

In this article, we define the ATLID Climate Product, Short-Term (CLIMP-ST) and ATLID Climate Product, Long-Term (CLIMP-LT). The purpose of CLIMP-ST is to help evaluate the description of cloud processes in climate models, beyond what is already done with existing space lidar observations, thanks to ATLID new capabilities. The CLIMP-LT will merge the ATLID cloud observations with previous space lidar observations to build a long-term cloud lidar record useful to evaluate the cloud climate variability predicted by climate models.

We start with comparing the cloud detection capabilities of ATLID and CALIOP (Cloud-Aerosol Lidar with Orthogonal Polarization) in day- and night-time, on a profile-to-profile basis in analyzing virtual ATLID and CALIOP measurements over synthetic cirrus and stratocumulus cloud scenes. We show that solar background noise affects the cloud detectability in daytime conditions differently for ATLID and CALIPSO.

We found that the simulated daytime ATLID measurements have lower noise than the CALIOP day-time simulated measurements. This allows lowering the cloud detection thresholds for ATLID compared to CALIOP and enables ATLID to detect optically thinner clouds than CALIOP in daytime at high horizontal resolution without false cloud detection. These lower threshold values will be used to build the ATLID-ST. Therefore, CLIMP-ST should provide an advance to evaluate optically thin clouds like cirrus or ice polar clouds in climate models compared to the current existing capability.

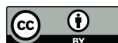

We also found that ATLID and CALIPSO may detect similar clouds if we convert ATLID 355nm files to 532nm profiles and apply the same cloud detection thresholds as the ones used in GOCCCP (GCM Oriented Calipso Cloud Product). Therefore, this approach will be used to build the CLIMP-LT. The CLIMP-LT data will be merged with the GOCCP data to get a long-term (2006-2030's) cloud climate record. Finally, we investigate the detectability of cloud changes induced by human-caused climate warming within a virtual long-term cloud monthly gridded lidar dataset over the 2008-2034 period that we obtained from two ocean-atmosphere-coupled climate models coupled with a lidar simulator. We found that a long-term trend of opaque cloud cover should emerge from short-term natural climate variability after 4 to 7 years. ATLID measurements (merged with CALIPSO measurements) according to predictions from the considered climate models. We conclude that a long-term lidar cloud record build from the merge of the actual ATLID-LT data with CALIPSO-GOCCP data will be a useful tool to monitor cloud changes and to evaluate the realism of the cloud changes predicted by climate models.

## 1 Introduction

Clouds play an important role in the radiative energy budget of Earth. The radiative effect of clouds is twofold: on the one hand, clouds reflect some of the Sun's radiance during the day, thus preventing surface warming. On the other hand, high thin clouds trap some of the outgoing infrared radiation emitted by the surface and re-emit it back to the ground, thus contributing to its heating. Overall, at global scale, clouds contribute to cool the Earth radiatively, but quantifying precisely this global effect as well as the influence of clouds on the Earth radiative budget everywhere requires knowing the coverage of clouds, as well as their geographical and vertical distributions, temperature, and optical properties. Cloud properties are expected to change under the influence of climate warming, leading to changes in the amplitude of the overall cloud radiative cooling. But how cloud properties change as climate warms is uncertain (e.g., Zelinka et al., 2012, 2016; Chepfer et al., 2014; Vaillant de Guélis et al., 2018; Perpina et al., 2021). Cloud feedback uncertainties are an important contributor to climate sensitivity uncertainty and therefore limit our ability to predict the future evolution of climate for a given CO<sub>2</sub> emission scenario (e.g. Winker, 2017; Zelinka et al., 2020).

Global-scale round-the-clock satellite observations of Earth's atmosphere provide invaluable information that improves our knowledge of current clouds properties and helps evaluating the cloud description in climate models in current climate simulations. Among the remote sensing techniques, active sounding plays a special role, because of its high vertical and horizontal resolution and high sensitivity. The launch in 2006 of Cloud-Aerosol Lidar and Infrared Pathfinder Satellite Observation (CALIPSO, Winker et al., 2006) started the era of operational space-borne optical active sounding of the Earth's atmosphere for clouds and aerosols. It was followed with the CATS (Cloud-Aerosol Transport System) lidar on-board ISS in 2015 (McGill et al., 2015) and the Atmospheric Laser Doppler INstrument (ALADIN) lidar on-board Aeolus in 2018 (Reitebuch et al., 2020; Straume et al., 2020). The next important step is the ATLID instrument (do Carmo et al., 2021), from the EarthCARE mission (e.g. Hélière et al., 2012; Illingworth et al., 2015), expected to launch in 2023. With this lidar, the scientific community will continue receiving invaluable vertically resolved information of atmospheric optical properties



65 needed for the estimation of cloud occurrence frequency, thickness, and height. Cloud profiles deduced from CALIOP  
observations have been widely used to evaluate the cloud description in climate models (e.g., Nam et al., 2012; Cesana et al.,  
2019), and have provided leads to improve this description (e.g., Konsta et al., 2012). To avoid any discrepancy in cloud  
definition between model and observation, and to allow consistent comparisons between clouds simulated by climate models  
and observed by satellite, the Cloud Feedback Model Intercomparison Project (CFMIP) has developed the CFMIP Observation  
70 Simulator Package (COSP1, Bodas-Salcedo et al., 2011), followed by COSP2 (Swales et al., 2018). These packages include a  
lidar simulator (Chepfer et al. 2008; Reverdy et al. 2015; Guzman et al. 2019; Cesana et al. 2019) that mimics the measurements  
that would be obtained by spaceborne lidars if they were overflying the atmosphere simulated by a climate model. In parallel  
to the COSP lidar simulator, a Level 2 and 3 cloud product named CALIPSO-GOCCP (Chepfer et al. 2008, 2010, 2013;  
Guzman et al. 2017; Cesana et al., 2019) was designed to ensure scale-aware and definition-aware comparison between  
75 simulated and observed clouds.

Despite the similarity of the measuring principle of ATLID and CALIOP lidars – the emitter sends a brief pulse of laser  
radiation to the atmosphere, and the receiver registers a time-resolved backscatter signal collected through its telescope –, the  
sensitivity of both lidars to the same clouds is different. This is explained by differences in observational geometry, in  
wavelength, pulse energy and repetition frequency, in telescope diameter and detector type, in the capability of detecting  
80 molecular backscatter separately from the particulate one, in vertical and horizontal resolution and averaging, and so on. Since  
the CALIPSO-GOCCP algorithm cannot be applied directly to ATLID data, a specific algorithm had to be developed, which  
generates the ATLID cloud product CLIMP (CLIMate Product).

The present paper describes the design of the CLIMP product and its associated algorithm, developed with the following two  
goals in mind:

85 (1) On short time scales, such as the period of ATLID operation, CLIMP should help improve the current evaluation of cloud  
description in climate models beyond CALIPSO. From this point on view, CLIMP should take advantage of ATLID  
capabilities compared to CALIPSO from the point of view of evaluation of clouds in climate models, while maintaining  
compliance with the COSP/lidar framework.

(2) On long time scales, CLIMP should enable building a merged CALIPSO+ATLID long-term lidar cloud product, in which  
90 ~~the same~~ clouds are detected despite the instrumental and orbital differences between ATLID and CALIOP. From this point  
of view, CLIMP should maximize consistency with GOCCP. The GOCCP+CLIMP long-term dataset should describe more  
than 20 years of cloud profiles at global scale, which will enable the study and evaluation in climate models of inter-annual  
variability in cloud profiles due to multi-annual climate variations (e.g., El Nino, NAO, Madden-Julian oscillation). Its analysis  
will moreover make possible the detection of ~~cloud~~ changes because of human-induced climate warming, and their evaluation  
95 in climate model simulations.

Therefore, CLIMP will be composed of two datasets named CLIMP-ST (short-term) and CLIMP-LT (long-term). Both will  
mainly differ by their cloud detection threshold, as we will see later in the text. This threshold is parameterized in COSP/lidar  
and can be easily changed when comparing simulated data to CLIMP-ST and CLIMP-LT.

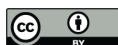

100 The CLIMP product and algorithm inherit from the approach developed for CALIPSO-GOCCP. This algorithm processes L1 data in exactly the same way as the COSP lidar simulator does. GOCCP is part of the CFMIP-OBS database included in Obs4Mips (Waliser et al., 2020) for model evaluation. Differences between GOCCP, NASA, and JAXA CALIOP cloud products were documented in Chepfer et al. (2013) and Cesana et al. (2019).

The three key elements of the GOCCP algorithm, which need to be kept when developing CLIMP, are:

105 (i) lidar profiles are not averaged horizontally before cloud detection (1) to keep consistency with the subgridding module SCOPS (Klein and Jacob, 1999) included in COSP which is required to respect the Eulerian framework of climate model simulations, and (2) to avoid overestimate the cloud fraction in shallow clouds (e.g., Chepfer et 2008, 2013; Feofilov et al. 2022).

110 (ii) lidar measurements are averaged vertically every 480m, to improve the signal-to-noise ratio (SNR) while maintaining consistency with CloudSat data used to compare with COSP/radar outputs (Marchand et al., 2009; Haynes et al., 2007). This value of 480m can be different in CLIMP as it can be changed in COSP/lidar, but averaging lidar signal vertically before cloud detection should remain the way to increase ATLID SNR when needed for climate mode evaluation.

115 (iii) cloud detection thresholds are chosen for consistency with COSP/lidar and to prevent false cloud detections in CALIOP L1 daytime data at full horizontal resolution and 480m-averaged vertical resolution. The cloud detection threshold can be modified in CLIMP but then should also be modified in COSP/lidar. This threshold needs to be constant over a full dataset and cannot be scene-dependent.

The structure of the article is as follows. In Section 2, we briefly describe the differences and similarities between ATLID and CALIOP, the formalism necessary to understand the analysis presented in the next sections, and the cloud variables used in this study. Section 3 describes the physical elements that matter for the development of CLIMP-ST. Using synthetic cloud scenes (3.1) and a numerical chain which simulates lidar profiles observed by CALIPSO and ATLID over the cloud scenes at 120 full spatial resolution and instantaneous time scales (3.2), we define the cloud detection scheme of CLIMP-ST (3.3). In this part of the study, we try to answer whether ATLID might observe optically thinner cloud in day time than CALIOP at full horizontal resolution, a useful capability to evaluate the description of cirrus in climate models. Section 4 describes the physical elements that matter for the development of CLIMP-LT. Section 4.1 presents the cloud detection scheme used in CLIMP-LT to detect the same cloud as CALIPSO-GOCCP despite the instrumental differences between ATLID and CALIOP. Then we 125 analyze a long-term (multi-decadal, monthly averaged), global-scale space lidar virtual dataset built from climate models + COSP/lidar simulation (Sect. 4.2) to illustrate how a merged dataset “CLIMP-LT + CALIPSO-GOCCP” could help evaluate climate models’ predictions of multi-decadal cloud changes (Sect. 4.3). We conclude in Section 5.





## 2. Definitions

### 130 2.1. Differences between CALIOP/CALIPSO and ATLID/EarthCARE space borne lidars

CALIOP, a two-wavelength polarization-sensitive near-nadir viewing lidar, provides high-resolution vertical profiles of aerosols and clouds (Winker et al., 2009). Its orbital altitude is 705km, and its orbit is inclined at 98.05°. The lidar overpasses the equator at 1h30 and 13h30 LST. It uses three receiver channels: one measuring the 1064 nm backscatter intensity and two channels measuring orthogonally polarized components of the 532 nm backscattered signal. Cloud and aerosol layers are detected by comparing the measured 532 nm signal return with the return expected from a molecular atmosphere (see the definitions later). The other instrumental parameters of this lidar are described in Table 1.

The goals of the EarthCARE mission are “to retrieve vertical profiles of clouds and aerosols, and the characteristics of their radiative and microphysical properties to determine flux gradients within the atmosphere and fluxes at the Earth’s surface, as well as to measure directly the fluxes at the top of the atmosphere and also to clarify the processes involved in aerosol-cloud and cloud-precipitation-convection interactions” (Hélière et al., 2012; Illingworth et al., 2015). The ATLID instrument onboard the EarthCARE satellite will measure the attenuated atmospheric backscatter with a vertical resolution of ~100m and ~500m in the altitude ranges of 0–20 km and 20–40km, respectively. ATLID is a high-spectral-resolution lidar (HSRL), which can separate the thermally broadened molecular backscatter (Rayleigh) from the unbroadened backscatter from atmospheric particles (Mie) (Durand et al., 2007). This helps ATLID retrieve extinction and backscatter vertical profiles without assuming the extinction-to-backscatter ratio (as in CALIOP retrievals), which is poorly known, especially for aerosols (e.g. Eckerman, 1998).

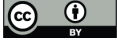

| Parameter                                     | CALIOP      | ATLID         |
|-----------------------------------------------|-------------|---------------|
| Altitude, [km]                                | 690         | 393           |
| Orbital inclination, [deg]                    | 98.05       | 97.050        |
| Wavelength, [nm]                              | 532/1064    | 355           |
| Pulse Repetition Frequency, [Hz]              | 20          | 51 (25.5)*    |
| Horizontal distance between profiles, [m]     | 333         | 285           |
| Finest Vertical resolution (troposphere), [m] | 30          | 100           |
| Telescope diameter, [m]                       | 0.85        | 0.6           |
| Telescope Field of view, [μrad]               | 130         | 64            |
| Energy/pulse, [mJ]                            | 110         | 35 (70)*      |
| Footprint, [m]                                | 90          | 29            |
| Laser beam divergence [μrad]                  | 100         | 45            |
| Solar filter bandwidth, [nm]                  | 0.04/0.475  | 0.71 (0.35)** |
| Total optical system loss coefficient         | 0.67/0.68   | 0.62          |
| Detector efficiency                           | 0.109/0.4   | 0.85          |
| Dark current, [phot/s]                        | 1331/1.85e7 | 153           |

Table 1: specifications of the CALIOP and ATLID spaceborne lidars considered in this article. We gathered specifications from Winker et al. (2019) for CALIOP and from do Carmo et al. (2021) for ATLID. (\*) the original pulse repetition frequency of ATLID laser is 51Hz at the energy of 35 mJ per pulse, but the measurements are doubled onboard the satellite, so one can consider the effective frequency and energy per pulse to be equal to 25.5 and 70 mJ, respectively. (\*\*) the solar filter bandwidth of ATLID is 0.71 nm, but the transmission function of the Mie channel is approximately half of that, so one should calculate the solar noise in this channel with narrower filter width.

When considering signal quality and performance, some parameters are in favor of CALIOP (telescope diameter, energy per pulse, solar filter bandwidth) whereas others favor ATLID (altitude, noise level). In the next section, we show how these differences affect the detectability of clouds. We excluded the multiple scattering coefficient from the table since it is an important and complex parameter of lidar instrument, which depends on its several parameters. Instead, we discuss it in a dedicated paragraph below.

## 2.2. Lidar equation

The formalism used in this work was described in details in (Feofilov et al., 2022). In this section, we repeat only the basic definitions needed for understanding the material presented below.

An atmospheric lidar sends a brief pulse of laser radiation towards the atmosphere. The lidar optics collect the backscattered photons and drive them to a detector. The detected signal is time-resolved: supposing each photon travelled straight forward and back, each time bin corresponds to a fixed distance from the lidar to the atmospheric layer where backscattering occurred.

The propagation of laser light through the atmosphere and backwards to the detector is described by the lidar equation:

$$ATB(\lambda, z) = (\beta_{mol}(\lambda, z) + \beta_{part}(\lambda, z)) \times e^{-2 \int_{z_{sat}}^z (\alpha_{mol}(\lambda, z') + \eta \alpha_{part}(\lambda, z')) dz'} \quad (1)$$

where ATB stands for Attenuated Total Backscatter [ $m^{-1} sr^{-1}$ ],  $\beta_{mol}(\lambda, z)$  and  $\beta_{part}(\lambda, z)$  are the wavelength-dependent molecular and particulate backscatter coefficients [ $m^{-1} sr^{-1}$ ],  $\alpha_{mol}(\lambda, z)$  and  $\alpha_{part}(\lambda, z)$  are the extinction coefficients [ $m^{-1}$ ],



$Z_{\text{sat}}$  is the altitude of the satellite,  $\lambda$  is the wavelength, and  $\eta$  is a multiple scattering coefficient (e.g., Platt et al., 1973; Garnier et al., 2015; Donovan, 2016).

For the HSRL lidar, one can write similar equations for the attenuated radiance backscattered from atmospheric particles and molecules (APB and AMB), respectively:

$$APB(\lambda, z) = \beta_{\text{part}}(\lambda, z) \times e^{-2 \int_{Z_{\text{sat}}}^z (\alpha_{\text{mol}}(\lambda, z') + \eta \alpha_{\text{part}}(\lambda, z')) dz'} \quad (2)$$

$$AMB(\lambda, z) = \beta_{\text{mol}}(\lambda, z) \times e^{-2 \int_{Z_{\text{sat}}}^z (\alpha_{\text{mol}}(\lambda, z') + \eta \alpha_{\text{part}}(\lambda, z')) dz'} \quad (3)$$

For cloud definition, we also need to define the attenuated molecular backscatter for clear sky conditions

$$ATB_{\text{mol}}(\lambda, z) = \beta_{\text{mol}}(\lambda, z) \times e^{-2 \int_{Z_{\text{sat}}}^z \alpha_{\text{mol}}(\lambda, z') dz'} \quad (4)$$

The physical meaning of  $\eta$  in Eqs. (1-3) is an increase in the number of photons remaining in the lidar receiver field of view besides the ones directly backscattered by the layer, and its value depends on the type of scattering media, FOV of the telescope, and laser beam divergence. The typical value of  $\eta$  varies between 0.5 and 0.8 for commonly used lidars (Chiriaco et al., 2006; Chepfer et al., 2008, 2013; Garnier et al., 2015; Donovan, 2016; see also Appendix B of Reverdy et al., 2015). Setting  $\eta$  to 1 means no multiple scattering, and would correspond to an infinitely narrow FOV telescope combined with a infinitely small laser beam divergence. In CALIOP cloud products up to version 3, the  $\eta$  was set to 0.6, whereas for version 4.10 a temperature-dependent coefficient was used, which varied in between 0.46 and 0.78 (Young et al., 2018). A detailed modeling of  $\eta$  for different cloud types observed by CALIOP and ATLID (Shcherbakov et al., 2022) shows that  $\eta$  depends on the cloud thickness and type and that the ATLID values are somewhat higher than those of CALIOP. Based on these works, we set a fixed value of  $\eta$  to 0.6 for CALIOP and to 0.75 for ATLID. This is an approximation and a more complex approach might be required for processing real data, but our tests show that the conclusions of the present work do not change if we vary  $\eta$  within  $\pm 0.1$ .

### 2.3 Cloud detection and cloud variables

Considering a single-pulse profile measurement, we declare a layer as cloudy if the following two conditions are met:

$$SR(532nm, z) = \frac{ATB(532nm, z)}{ATB_{\text{mol}}(532nm, z)} > 5 \text{ and } ATB(532nm, z) - ATB_{\text{mol}}(532nm, z) > 2.5 \times 10^{-6} m^{-1} sr^{-1} \quad (5)$$

This definition is used in CALIPSO-GOCCP (e.g. Chepfer et al., 2008, 2013) and we suggest keeping it for other lidars to ensure the consistency between cloud products as discussed later.

In application to ATLID, this will mean using the recalculated to 532nm values of ATB, which will be estimated from (1)  $\beta_{\text{part}}(355nm, z)$  and  $\alpha_{\text{part}}(355nm, z)$  retrieved from the measurements (Eqs. 2 and 3) and  $\beta_{\text{mol}}(532nm, z)$  and  $\alpha_{\text{mol}}(532nm, z)$  retrieved or estimated from pressure-temperature profiles from reanalysis. In the numerical experiment below, we calculated  $ATB_{\text{mol}}(532nm, z) = \beta_{\text{mol}}(532nm, z) \times e^{-2 \int_{Z_{\text{sat}}}^z \alpha_{\text{mol}}(532, z') dz'}$  using the available pressure-temperature profiles and the formalism provided in (Feofilov et al., 2022).

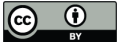

For the cloud properties, we use the same variables as in CALIPSO-GOCCP (Chepfer et al. 2010): cloud fraction  $CF(z)$ , opaque cloud cover  $C_{opaque}$ , and opaque cloud height  $Z_{opaque}$ . If a given atmospheric layer was observed multiple times or if was sampled vertically at several points, we define the cloud fraction profile  $CF(z)$  in a usual way:

$$CF(z) = \frac{N_{cld}(z)}{N_{tot}(z)} \quad (6)$$

where  $N_{cld}(z)$  is the number of times the conditions of Eq. (5) are met and  $N_{tot}(z)$  is the total number of measurements in this layer. The opaque cloud cover  $C_{opaque}$  is used in long-time series and is defined over the  $2^\circ \times 2^\circ$  latitude/longitude gridded data as follows:

$$C_{opaque} = \frac{N_{opaque\_prof}}{N_{total\_prof}} \quad (7)$$

where  $N_{opaque\_prof}$  is the number of vertical profiles, for which an attenuation corresponding to a presence of opaque cloud was found and  $N_{total\_prof}$  is the total number of measurements in  $2^\circ \times 2^\circ$  grid box. For an individual lidar profile,  $Z_{opaque}$  corresponds to an altitude of full attenuation of backscattered signal whereas for gridded data,  $Z_{opaque}$  is an opaque-cloud-cover-weighted sum (Guzman et al., 2017).

### 3. The CLIMP short-term dataset

In this section, we search for useful cloud information for model evaluation that can be ~~got thanks to~~ ATLID beyond the CALIPSO data. For this purpose, we use high resolution cloud scenes (Sect. 3.1), simulate how they are observed by ATLID and CALIPSO (Sect. 3.2), and compare the  $SR(z)$  profiles seen by the 2 lidars (Sect. 3.3) and the clouds detected by the 2 instruments (Sect.3.4). To address the comparability of clouds observed by two space-borne lidars, we used the existing methodology (Reverdy et al., 2015; Feofilov et al., 2022), but with used a much finer-scaled cloud model, updated instrumental parameters of ATLID, and a new simulation chain, which estimates noise at the detector level and propagates it to cloud product level. The main question we sought to answer in this section was whether ATLID can observe optically thinner clouds than CALIPSO in daytime, a useful capability to evaluate thin cirrus clouds in climate models. At the same time, we checked whether the chosen cloud detection parameters and instrumental properties affect the detection of highly inhomogeneous low-level thick clouds.

#### 3.1 Cloud generating model

The 3DCLOUD model (Szczap et al., 2014) generates three-dimensional (3-D) spatial structures of stratocumulus and cirrus water content cloud that share some statistical properties observed in real clouds such as the inhomogeneity parameter  $\rho_{inh}$  (standard deviation normalized by the mean of the water content) and the Fourier spectral slope  $\beta_{inh}$  close to  $-5/3$  between the smallest scale of the simulation to the outer scale  $L_{out}$  (where the spectrum becomes more flat). We assume that water content follows a gamma distribution. 3DCLOUD\_V2 presented in Alkasem et al. (2017) is based on wavelet framework instead of Fourier framework. First, 3DCLOUD assimilates meteorological profiles (humidity, pressure, temperature and wind velocity) and solves drastically simplified basic atmospheric equations in order to simulate 3D water content. Second, the Fourier filtering method is used to constrain the intensity of mean water content,  $\rho_{inh}$ ,  $\beta_{inh}$ , and  $L_{out}$ , values provided by the user.



Conditions of simulations to generate the stratocumulus in this study (see Fig. A1a and Fig. A1b in the Appendix A) are identical as those used in Szczap et al. (2014) for the DYCOMS2-RF01 case (the first Research Flight of the second Dynamics and Chemistry of Marine Stratocumulus) for the marine stratocumulus regime (Stevens et al., 2005). We have only changed the number of voxels in the  $x$ ,  $y$  and  $z$  direction to  $N_x = N_y = 1000$  and  $N_z = 50$ , respectively. The corresponding spatial resolutions were set to  $\Delta_x = \Delta_y = 100$  m and  $\Delta_z = 24$  m, respectively. The vertical extension of the simulated area is still  $L_z = 1200$  m, but the horizontal extensions for this study are  $L_x = L_y = 100$  km.

If the number of voxels is large, the 3DCLOUD and 3DCLOUD\_V2 are very time-consuming (see Table 1 in Szczap et al., 2014) and cannot assimilate the fractional coverage for cirrus cloud. Therefore, we have developed 3DCLOUD\_V3 that overcomes these two drawbacks for the cirrus cloud. This model will be published elsewhere. Here, we present only an outline of the 3DCLOUD\_V3 algorithm.

To increase the calculation speed in 3DCLOUD\_V3, we generate clouds using modified statistic tools developed as part of stage 2 of 3DCLOUD. The first stage of 3DCLOUD (i.e. the step of solving simplified basic atmospheric equations, which is very time consuming) is no longer carried out in 3DCLOUD\_V3. Thereby, 3DCLOUD\_V3 can be seen as a purely stochastic cirrus cloud generator. The user has to provide, in addition to  $N_x$ ,  $N_y$ ,  $N_z$ ,  $\Delta_x$ ,  $\Delta_y$ , and  $\Delta_z$ , the mean Ice Water Path (IWP),  $L_{out}$ , the shape of the vertical profile of Ice Water Content (IWC),  $\rho(z)$ ,  $\beta(z)$ , and of horizontal wind velocity components  $u(z)$  and  $v(z)$ , and finally the cloud fraction  $CF$ . The algorithm works as follows:

- (1) Generation of 3D isotropic field with a Gaussian probability density function (PDF) from a 3D inverse Fourier transform assuming random phase for each Fourier amplitude and a 3D spectral energy density with 1D spectral slope  $\beta$  close to  $-5/3$  between the smallest scale of  $L_{out}$ .
- (2) Transformation of the 2-D Gaussian PDF to a 2-D Gamma PDF at each  $z$  level, satisfying the values of  $IWC(z)$ ,  $\rho(z)$ , and  $\beta(z)$ . Alternatively, the shape of the vertical profile of IWC can also be stipulated (rectangular, upper triangle, lower triangle and isosceles trapezoid (Feofilov et al., 2015)).
- (3) Horizontal displacement, at each  $z$  level, of 2-D IWC (to simulate fallstreaks) computed from  $u(z)$  and  $v(z)$ , based on the model of sedimentation proposed by Hogan and Kew (2005). In 3DCLOUD\_V3, the user can choose the value of the sedimentation velocity: either constant or function of IWC (see formula into Fig.12 in Heymsfield et al., 2017). Alternatively, the wind velocity vertical profile can be computed from a constant value of the vertical wind shear prescribed by the user; in this case, the user has also to provide the “generated-level height” as explained in Hogan and Kew (2005).
- (4) Iterative modification of the vertical profile of the cloud cover in order to obtain the  $CF$  value prescribed by the user.

In the Appendix A, Fig. A2a and Fig. 2b demonstrate the examples of 2D IWP and the 3D IWC volume rendering of the cirrus generated with 3DCLOUD\_V3, where  $N_x = N_y = 1000$ ,  $N_z = 100$ ,  $\Delta_x = \Delta_y = 100$  m and  $\Delta_z = 20$  m. The mean IWP is set to 1 g.m<sup>-2</sup>. The IWC vertical profile shape is “rectangular”. The geometric depth is 2 km. The outer scale is  $L_{out} = 20$  km.

We set the constant vertical wind shear to 5 m.s<sup>-1</sup>.km<sup>-1</sup> in the  $x$  and  $y$  directions and the generated-level height is 400 m under the cloud top. The inhomogeneity parameter of IWC is  $\rho = 0.4$ . The spectral slope  $\beta$  is equal to  $-5/3$ . Figure A2c shows the



gamma-like PDF of the IWC (we ignored null values) and Fig. A2d shows the mean power spectra of IWP (and IWC) along  
265  $x$  and  $y$  directions (and  $z$  direction), with 1-D spectral slope close to  $-2.0$  ( $-1.3$ ) between of  $L_{out} = 20$  km and finest spatial  
resolution. As expected, values of spectral slope of IWP are smaller than those of IWC (i.e. IWP signal is “smoother” than  
IWC signal) because the IWP is the vertically integral quantity of the IWC. One can note that the IWC spectral slope is slightly  
smaller than the prescribed theoretical value  $\beta = -5/3$  because of the many null values of the IWC; we plan to remove this  
bias in the final version of 3DCLOUD\_V3.

### 270 3.2 Numerical chain to simulate of cloud observations by CALIOP and ATLID at high resolution

We performed the following numerical experiment outlined in a flowchart in Fig. 1. First, we created a gridded global  
atmosphere from the output of the U.S. Department of Energy’s Energy Exascale Earth System Model (E3SM) atmosphere  
model (EAM) version 1 (EAMv1; Rasch et al., 2019) for the conditions of autumn equinox in Northern hemisphere. Since we  
wanted to address both high- and low-level cloud detection, we picked up only the tropical part of orbit between  $5^{\circ}\text{S}$  and  $5^{\circ}\text{N}$   
275 and used this data as a set of smooth “background” profiles. Since this model does not provide the small-scale variability  
needed for our experiment, we used the subgrid model described in Section 3.1, which generates realistic cloud profiles at grid  
comparable or finer than the distance between two consecutive footprints of studied lidars. To address the most challenging  
observation conditions, we picked up two cloud types: (1) thin cirrus with optical depths ( $\tau$ ) of about  $0.03$ – $0.1$  per layer (Sassen  
and Comstock, 2001) and (2) stratocumulus clouds with their high horizontal variability and large optical depths ( $\tau > 10$ ). These  
280 clouds were simulated using an updated 3DCLOUD\_V3 model (see Sect. 3.3) and provided as gridded sets of ice water content  
(IWC) and liquid water content (LWC) values for cirrus and stratocumulus clouds, respectively.

These gridded sets were converted to pseudo orbits by slicing them along the diagonal lines and arranging the slices into “lidar  
curtains”, each comprising 20000 individual profiles and split to daytime and nighttime parts, 10000 profiles each. This way  
we got almost seamless cloud distributions, which followed the variability prescribed by 3DCLOUD\_V3 model and at the  
285 same time resembled parts of real lidar orbits. We show the most representative parts of these pseudo orbits in Fig. 2 and 3 for  
cirrus and stratocumulus clouds, respectively, and we discuss them below.

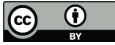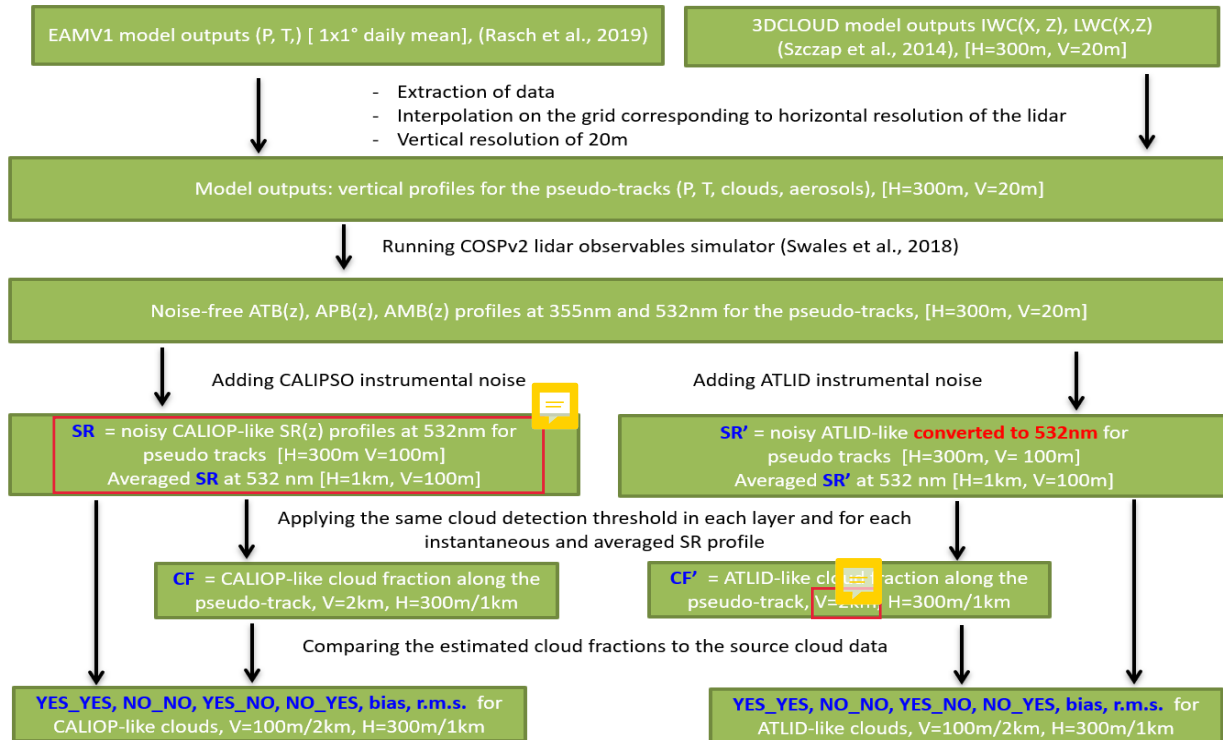

290 **Figure 1: Flowchart explaining the numerical experiment on comparing clouds retrieved from CALIOP and ATLID observations. Green boxes list the input and output data. Black text between boxes describes actions performed on each dataset. Blue text in the boxes marks the datasets used in the estimation. White text in square brackets in the boxes indicates horizontal (H) and vertical (V) resolutions of the datasets. Note that the ATLID SR' values are estimated at 532nm (see Sect. 2.3).**

With these two datasets covering both the daytime and the nighttime scenes, we performed a full series of simulations explained in Fig. 1. Namely, we fed the high-resolution atmospheric inputs described above to the CALIOP and ATLID simulators (Chepfer et al., 2008; Reverdy et al., 2015) included into the Cloud Feedback Model Intercomparison Project Observational Simulator Package, v2 (COSP2) simulator (Swales et al., 2018). These simulators do not account for instrumental noise effects, so their outputs were processed by a third part of the simulation chain (Fig. 1), which estimates noise and its propagation in the lidar system (Feofilov et al., 2022). The signal noise at the detector level depends on a number of factors: the signal amplitude, the detector's own noise, solar background and its fluctuation, and readout noise. In the case of CALIOP, the instrumental noise directly propagates into the retrieved product whereas for ATLID there is a cross-talk between the molecular and particulate channels, and the uncertainties in the retrieved  $\beta_{mol}(\lambda, z)$ ,  $\beta_{part}(\lambda, z)$ ,  $\alpha_{mol}(\lambda, z)$ , and  $\alpha_{part}(\lambda, z)$  coefficients will depend on the noise in both channels.

To address the information content of the backscattered radiance, it makes sense to define a useful signal and to estimate the SNR for this signal. For CALIOP the useful signal is represented by  $ATB(\lambda, z)$  (see Eq.1) whereas the ATLID can measure the molecular and particulate backscattered radiances separately, so it would be logical to call the  $APB(\lambda, z)$  (see Eq. 2) a signal, which carries the information about the cloud, and look at its SNR. For the sake of simplicity, we do not discuss here





the perpendicular channels of these two space lidars assuming that the backscattered depolarized radiance is detected the same way, so it would not change the conclusions based on the comparisons of the parallel component.

For the simulated CALIOP signals, we estimate  $SR(z)$  at 532 nm and  $CF(z)$  according to Eqs. 5 and 6. The simulated ATLID signals are converted to equivalent 532-nm  $SR(z)$  (see Sect. 2.2 and Feofilov et al., 2022). Then we calculate  $CF(z)$  for ATLID using the same Eqs. 5 and 6 with the same thresholds, and then we analyze the resulting cloud fraction.

To quantify the lidar cloud detection agreement and disagreement regarding the reference cloud dataset, we distinguish four cases: (1) when the lidar detects the actually cloudy layer as cloudy (YES\_YES case), (2) when there is no cloud and the lidar does not detect a cloud (NO\_NO), (3) when the lidar does not detect an existing cloudy layer (YES\_NO), and (4) when the lidar detects a cloud whereas the layer does not contain a cloud (NO\_YES). We will define their occurrence ratios as:

$$R_{YES\_YES}(z) = \frac{N_{YES\_YES}(z)}{N_{tot}(z)}; R_{NO\_NO}(z) = \frac{N_{NO\_NO}(z)}{N_{tot}(z)}; R_{YES\_NO}(z) = \frac{N_{YES\_NO}(z)}{N_{tot}(z)}; R_{NO\_YES}(z) = \frac{N_{NO\_YES}(z)}{N_{tot}(z)} \quad (8)$$

The sum of all four ratios in (Eq. 8) yields unity. A perfect match between the cloud distribution in the atmosphere and the product retrieved from the measurement would be when  $R_{YES\_YES}(z) + R_{NO\_NO}(z) = 1$  and  $R_{YES\_NO}(z) = R_{NO\_YES}(z) = 0$ .

### 3.3. Simulated ATLID and CALIPSO lidar profiles over cirrus and stratocumulus scenes

The most representative parts of pseudo orbits generated with the help of 3D\_CLOUDV3 model (Section 3.3) are shown in Fig. 2 and 3 for cirrus and stratocumulus clouds, respectively. We voluntarily split the “cloud curtain” generated from the output of this model (Sect. 3.2) to “daytime” and “nighttime” by setting the solar zenith angle (SZA) to 45° and 120°, respectively. These values are not linked with the cloud formation mechanisms in 3D\_CLOUDV3 model, they are just needed for a second half of the simulator chain (see noise-related boxes in Fig. 1). In Fig. 2ab, one can see a fine structure of modeled cirrus clouds. Looking at Fig. 2cd, one can say that the clouds are optically thin. This combination makes the detection of the clouds marked in Fig. 2ef challenging.



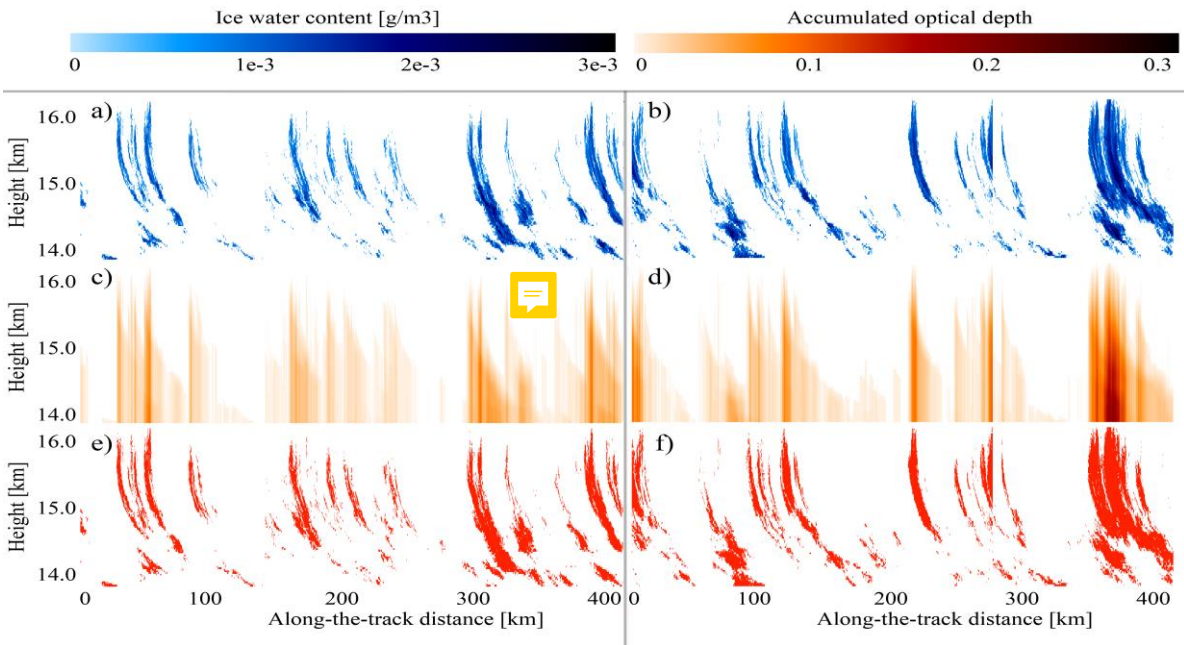

330 **Figure 2: Example of cirrus cloud (a) input data from 3DCLoud model used in the simulation: Ice water content (IWC), night corresponds to one piece of orbit; (b) IWC, day corresponds to another piece of orbit; (c) accumulated optical depth starting from the cloud top, night; (d) same as (c), day; (e) cloud mask, night; (f) cloud mask, day. We set the cloud mask to 1 whenever IWC>0. The cloud masks presented here are called “reference dataset” in the rest of the paper.**

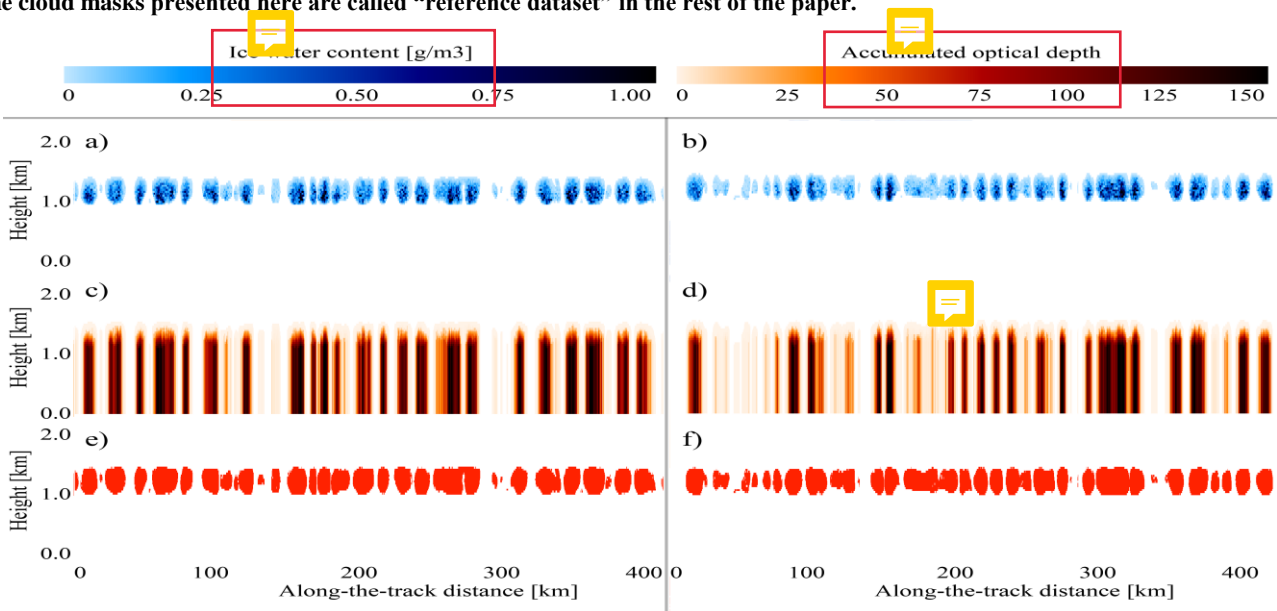

**Figure 3: Same as Fig. 2, but for stratocumulus cloud scenes.**

The stratocumulus clouds shown in Fig. 3 belong to another category of challenging observations. The clouds are closely spaced along the horizontal axis and at the same time they are optically thick (Fig. 3cd). From the latter panels, no optical



335 measurement from space will retrieve all the cloud layers shown in Fig. 3ef. Another problem of these clouds is that their horizontal averaging might bias the estimated cloud fraction (see e.g. Fig. 4 of Feofilov et al., 2022 and its discussion). In Fig. 4 and 5, demonstrate the differences between two lidars for four scenes (cirrus/stratocumulus clouds, day/night) using the simulated backscatter signal. For the cirrus cloud scene (Fig. 4), both the  $ATB(532nm, z)$  of CALIOP and the  $APB(355nm, z)$  of ATLID show a detectable signal in the areas marked by a cloud mask in Fig. 2ef. But, if one defines the signal detection level as three sigmas, one will see that a part of thin clouds will be missing. This is not surprising since we compare a “pure” modeled cloud with its noisy representation in the measuring system. What can be estimated from the image is the potential reliability of cloud detection from ATLID and CALIOP: according to the SNR values, the  $APB(355nm, z)$  signal from ATLID reaches higher SNR values than the  $ATB(532nm, z)$  signal from CALIOP. This gives a hint that the cloud detection from this instrument might be somewhat better than from CALIOP and that one can lower the detection threshold and still get the cloud instead of noise. This is a subject of one of the experiments described below. As for the day- vs nighttime difference, we do not see a big change between the left-hand-side and right-hand-side panels for ATLID (Fig. 4e-h) whereas the CALIOP shows higher noise in Fig. 4bd. We note here that the calculations were performed for the cases when only a thin cirrus cloud was present in the atmospheric column whereas the rest of it corresponded to clear sky conditions. In the real life, though, the second cloud layer beneath cirrus might increase the solar noise (see the right-hand-side panels of Fig. 5), and this will adversely affect the thin cloud detection from CALIOP measurements. This is explained by a larger field of view of CALIOP lidar (see Table 1). In our exercise, we wanted to estimate the best achievable results for a given cloud scene for each instrument and to compare the lidar performances. This way, the conclusions made below for the daytime scenes refer to the minimal differences between the two instruments.

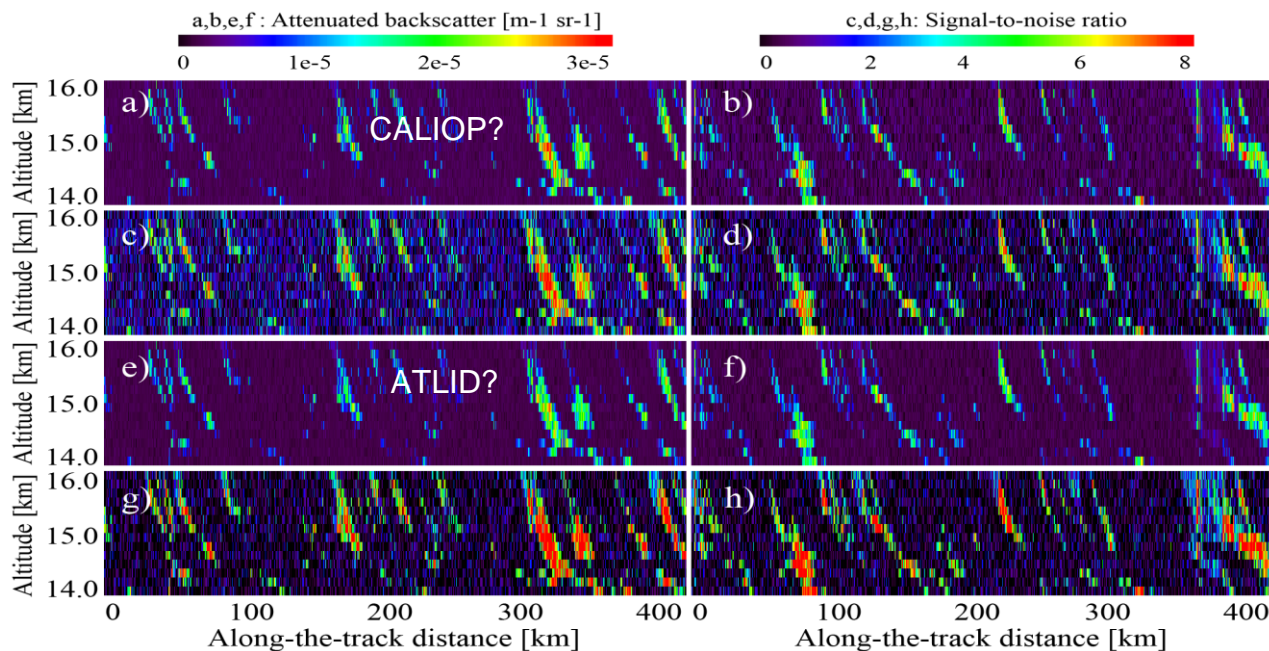

355

**Figure 4: Signals and signal-to-noise ratio for cirrus cloud scene. CALIOP: (a) ATB(532nm, z), night for one piece of orbit; (b) ATB(532nm, z) day for another piece of pseudo-orbit; (c) SNR, night; (d) SNR, day; ATLID: (a) APB(355nm, z), night; (b) APB(355nm, z) day; (c) SNR, night; (d) SNR, day. Note that the scene contains only these clouds and a clear sky below. For the reflective clouds beneath the cirrus layer, the daytime noise will be higher (see the right-hand-side panels of Fig. 5).**

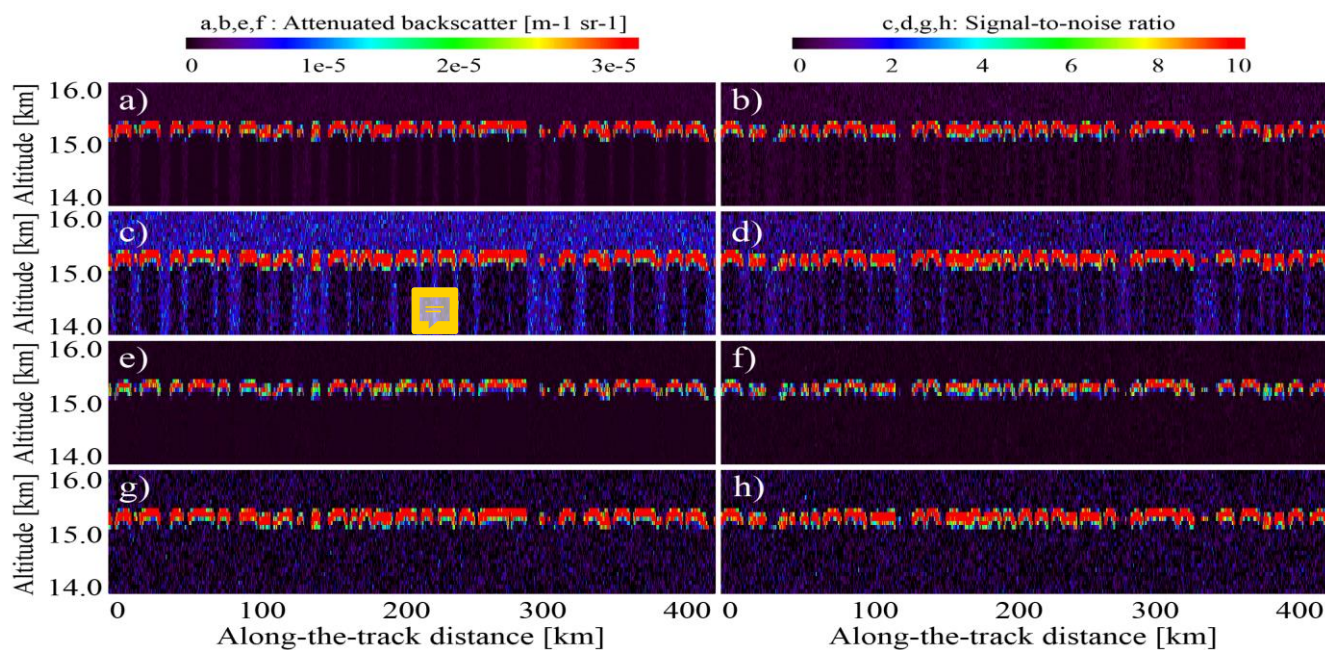

360

**Figure 5: Same as Fig. 4, but for stratocumulus cloud scenes.**



As for the stratocumulus clouds (Fig. 5), both the signals and SNRs are strong for both lidars, day and night. The dark “shadowed” areas, which are pronounced in Fig. 5cd and which are less pronounced in Fig. 5ef, correspond to areas without useful signal: at these heights, the signal is already attenuated by a cloud above, and the attenuation is so strong that even the cloud base is not visible at optical wavelengths (e.g. Guzman et al., 2017). Another remarkable feature shown in this plot is higher daytime noise for CALIOP (Fig. 5bd). Even though this high noise level does not affect the stratocumulus cloud detection itself, it might affect the aforementioned higher-level cloud detection and, from this point of view, ATLID has an advantage over CALIOP.

Summarizing, one can say that the  $ATB(532nm, z)$  signals of CALIOP and the  $APB(355nm, z)$  signals of ATLID carry similar type information for the same cloud scenes, but their SNRs suggest that (a) the daytime cloud detection from ATLID should be more reliable and (b) that one can lower the detection threshold for this instrument without admixing numerous noise-triggered clouds. Let’s now see how the signal quality transforms into the product quality and, in particular, to cloud detection quality.

### 3.4. Capability of ATLID to detect optically thinner clouds than CALIPSO

Here, we describe the test we performed seeking to answer whether the cloud detection limits (Eq. 5) defined in (Chepfer et al., 2010) could be lowered to detect thinner clouds. For this test, we followed the second half of the flowchart (Fig. 1) and calculated the  $SR(532nm, z)$  for CALIOP and the CALIOP-like  $SR(532nm, z)$  for ATLID (Eqs. 2-3), but we changed the cloud detection thresholds of (Eq. 5) to the following ones:

$$SR(532nm, z) > 3 \text{ and } ATB(532nm, z) - ATB_{mol}(532nm, z) > 1.5 \times 10^{-6} m^{-1} sr^{-1} \quad (9)$$

Then we estimated the cloud fractions and statistical agreement with the source cloud data (Eqs. 6,7). The threshold in the left-hand side of (Eq. 9) implies that the particulate backscatter in a layer, which we call a cloudy one, is twice the molecular one. The rationale for selecting this value was: for  $SR(532nm, z) = 3$ , the  $ATB(532nm, z)$  CALIOP signal is composed of approximately one third of molecular backscatter and two-thirds of particulate backscatter. At the same time, the  $AMB(355nm, z)$  signals of ATLID are comparable to  $APB(355nm, z)$  signals because of higher molecular backscatter at shorter wavelengths, so lowering the threshold further risks to hide the useful  $APB(355nm, z)$  signal in the noise propagated from the molecular channel. The threshold in the right-hand side of (Eq. 9) corresponds to the absolute values of  $ATB(532nm, z)$  recalculated for  $SR(532nm, z) = 3$  at the height of 8 km (Chepfer et al., 2010).

In Fig. 6ab, the  $SR(532nm, z)$  demonstrates the same patterns as the  $ATB(532nm, z)$  signals in Fig. 4ab. But, the daytime noise is more pronounced in this presentation, partially because of the chosen color scale. However, not all the noise from Fig. 6b propagates to Fig.6d. This is because of a second condition of (Eq. 9): the variations are partially filtered out by imposing a condition on the  $ATB(532nm, z)$  signals regarding  $ATB_{mol}(532nm, z)$ . Still, the daytime scene contains a lot of false detections marked by red in Fig. 6d. The overall characteristics of CALIOP cloud detection for this scene estimated over the whole simulated cloud dataset can be found in the 2<sup>nd</sup> and 4<sup>th</sup> columns of Table 2. The bottom two lines of this table refer to detectability of a cloud in the whole layer: if some values of the  $SR(532nm, z)$  triggered cloud detection, we calculated the



395 cloud fraction similar to (Eq. 6) and then compared the resulting series of cloud fractions with the reference one defined from the source dataset. The “total score” line refers to the cloud detection statistics and is defined in the caption. As one can see, for CALIOP the daytime noise increases the disagreement with the reference cloud dataset. The bias and the r.m.s. rows show the biggest change when passing from nighttime to daytime conditions.

The same analysis performed for ATLID (Fig. 7) shows less noise for the daytime (compare Fig. 7b with Fig. 6b), and the  
400 cloud detection quality for the clouds defined under (Eq. 9) is better than that of the CALIOP (compare Fig. 7d with Fig. 6d). The corresponding columns of Table 2 tell us that for ATLID the number of false detections during the day and night is approximately the same whereas for CALIOP using the Eq. 9 for the detection almost doubles the amount of false detections during daytime. We should also stress here that the obtained result is a lower estimate because we used the scenes without  
underlying clouds, which could reflect more solar radiance and further contaminate the observations. For these scenes, the  
405 difference between ATLID and CALIOP will be even larger.



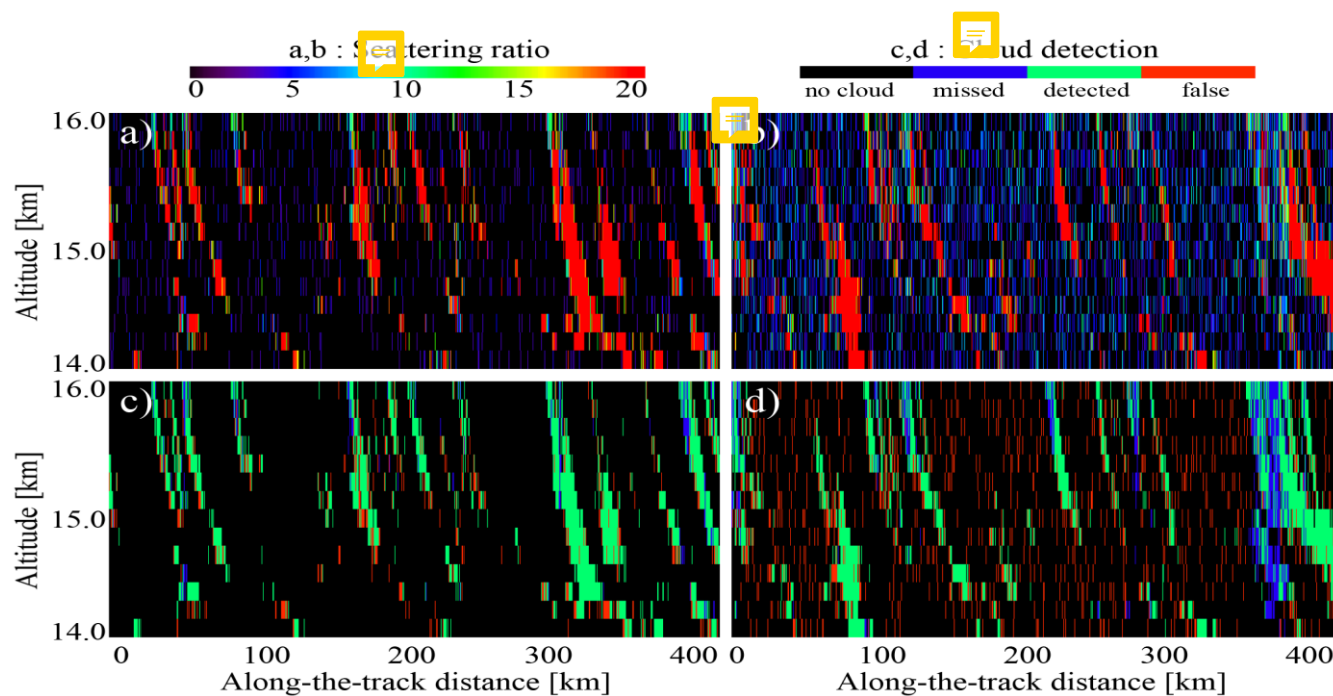

**Figure 6:** Scattering ratio and cloud detection estimated for cirrus clouds observed by CALIOP using Eq. 9: (a) scattering ratio, night; (b) scattering ratio, day; (c) cloud detection, night; (d) cloud detection, day. Note the color scale difference for (ab) and (cd).

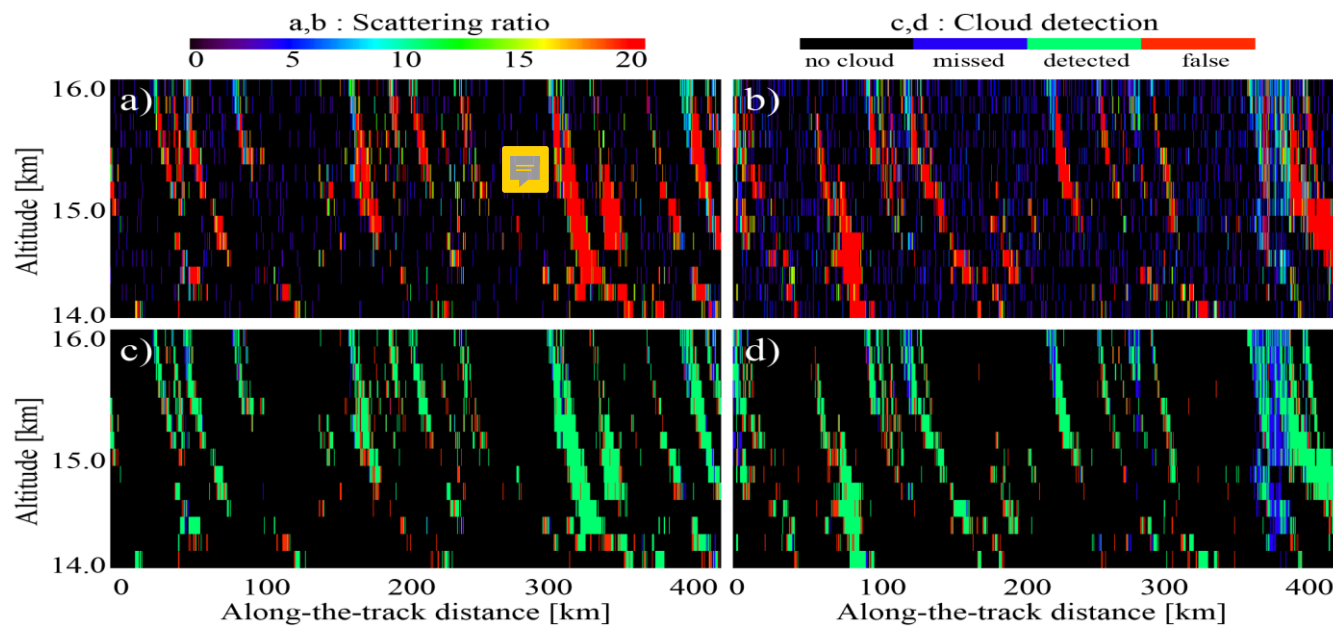

**Figure 7.** Same as Fig. 6, but for ATLID

410



| Lidar<br>Day/Night<br>Cloud | CALIOP    |    |    |    |          |    |    |    | ATLID     |    |    |    |           |    |    |    |
|-----------------------------|-----------|----|----|----|----------|----|----|----|-----------|----|----|----|-----------|----|----|----|
|                             | Night     |    |    |    | Day      |    |    |    | Night     |    |    |    | Day       |    |    |    |
|                             | Ci        |    | Sc |    | Ci       |    | Sc |    | Ci        |    | Sc |    | Ci        |    | Sc |    |
| Averaged                    | N         | Y  | N  | Y  | N        | Y  | N  | Y  | N         | Y  | N  | Y  | N         | Y  | N  | Y  |
| YES_YES                     | 12        | 12 | 8  | 8  | 10       | 10 | 9  | 9  | 12        | 12 | 8  | 8  | 10        | 10 | 9  | 9  |
| NO_NO                       | 84        | 84 | 87 | 87 | 80       | 82 | 83 | 87 | 84        | 84 | 87 | 87 | 84        | 84 | 86 | 87 |
| YES_NO                      | 1         | 1  | 5  | 5  | 4        | 4  | 4  | 4  | 1         | 1  | 5  | 5  | 4         | 4  | 4  | 4  |
| NO_YES                      | 3         | 3  | 0  | 0  | 7        | 4  | 4  | 0  | 3         | 3  | 0  | 0  | 3         | 3  | 1  | 0  |
| Tot. score                  | <b>96</b> | 96 | 95 | 95 | <b>8</b> | 91 | 91 | 95 | <b>96</b> | 96 | 95 | 95 | <b>93</b> | 93 | 95 | 95 |
| Bias                        | 8         | 9  | -4 | -3 | 23       | 13 | 0  | -2 | 7         | 9  | -5 | -4 | 12        | 8  | -4 | -3 |
| R.m.s.                      | 8         | 9  | 5  | 6  | 17       | 14 | 5  | 5  | 7         | 9  | 5  | 6  | 13        | 11 | 5  | 5  |

Table 2: Cloud detection statistics for CALIOP and ATLID when the cloud definition corresponds to as  $SR(532nm, z) > 3$  and  $ATB(\lambda, z) - ATB_{mol}(\lambda, z) > 1.5 \times 10^{-6} m^{-1} sr^{-1}$  (Eq. 9). The bias and r.m.s. values are defined for the clouds detected in the columns (see text) and we define the total score in % as  $100\% \times (1 - (YES\_NO + NO\_YES)/(YES\_YES + NO\_NO))$ . The same type plots built for the stratocumulus clouds (Fig. B1 and B2 in the Appendix B for CALIOP and ATLID, respectively) show a different picture. Strong signals and large SNRs shown in Fig. 5 help to unambiguously identify the cloud. Large fraction of underestimated clouds shown in blue in Fig. B1cd and Fig. B2cd corresponds to optically thick parts invisible for the instruments observing the scene from above. As with cirrus clouds, the false detections rate is higher for CALIOP during daytime, but overall the agreement between the lidar clouds and the source ones is better for stratocumulus clouds. To reduce the noise effects in cloud detection, we applied an averaging procedure over 1 km distance to all simulated signals and repeated the analysis. To reduce the number of plots, we do not show the averages, but in Table 2 we provide the estimates for averaging effects of the clouds defined under (Eq. 9) (seek columns marked with Averaged=Y). For CALIOP, the 1 km averages reduce the number of false detections and improve the total score for daytime simulations for cirrus. For ATLID with its lower daytime noise, the averaging procedure does not change the cloud detection quality. For the stratocumulus clouds, the averaging procedure is not required and sometimes it can lead to overestimate the cloud fraction (e.g. Chepfer et al. 2008, Feofilov et al. 2022). Still, it improves the score for CALIOP because of suppression of sporadic-noise-induced “clouds” above the real cloud layer (Fig. B1d). Overall, the ATLID-related columns in Table 2 demonstrate more consistency between daytime and nighttime cloud amounts and reference data than the CALIOP-related ones, and ATLID daytime cloud quality is better than that of CALIOP whereas the nighttime results are comparable. Our tests show that if the CALIOP-like solar filter were used in ATLID, one could lower the thresholds of Eq. 9 down to  $SR(532nm, z) > 2$  and  $ATB(532nm, z) - ATB_{mol}(532nm, z) > 1.0 \times 10^{-6} m^{-1} sr^{-1}$  without losing the quality of cloud retrievals whereas the same thresholds applied to CALIOP would give completely unacceptable results for daytime conditions.

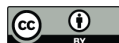

435 Of course, the examples considered in this section do not cover the whole range of high-, middle-, and low-level clouds, but they draw a line between the threshold values that can be used for cloud definition for CALIOP and ATLID and show that the difference is linked to noise characteristics of the instruments. This result suggests that ATLID should be able to observe optically thinner than CALIOP in day time at full horizontal resolution. If this was confirmed with the actual data when they will be there, then ATLID would improve our capability to evaluate the description of optically thin cirrus in climate models.

440 Using the cloud detection thresholds defined by Eq. 9 and refined for the real data flow using the methodology outlined above, the CLIMP short-term product will be produced.

#### 4. The CLIMP long-term dataset

##### 4.1. Capability of CLIMP and CALIPSO-GOCCP to detect the same clouds

445 One of the overarching goals of our study is to develop a method for merging the data from several space borne lidars into a continuous cloud record to detect long-term changes and get a seamless cloud climatology. Since the low threshold tested in the previous section revealed the sensitivity mismatch between the two instruments, we had to test whether the cloud detection thresholds developed for CALIOP (Chepfer et al., 2010) are applicable to ATLID, and whether the clouds retrieved using these thresholds are consistent between the two lidars. For this exercise, we followed the same scheme as in the previous section, but this time the clouds were defined in Eq. 5 as in Chepfer et al. (2010) and the follow-up works (e.g. Cesana et al., 2019; Guzman et al. 2017).

Fig. 8 demonstrates the daytime and nighttime scattering ratios above the detection thresholds (Eq. 5) and the corresponding cirrus cloud detection statistics for CALIOP. The  $SR(532nm, z)$  in Fig. 8ab demonstrates the same patterns as the  $ATB(532nm, z)$  signals in Fig. 4ab. As expected, this time the daytime noise is less pronounced (compare Fig. 8b to Fig. 6b).

455 Still, the daytime scene contains a certain number of false detections marked by red in Fig. 8d. The same analysis performed for ATLID (Fig. 9) also shows somewhat less noise in daytime (compare Fig. 9b with Fig. 7b). The cloud detection quality of ATLID is like that of the CALIOP (see Table 3). In this setup, the ATLID is just slightly better than CALIOP with its somewhat higher rate of false detections during the day (compare the “c” and “d” panels of Fig. 6, 7, 8, and 9 and the corresponding columns in Table 3). For stratocumulus clouds (figures B3 and B4 of the Appendix B), with their strong signals, the agreement between CALIOP and ATLID is also better than for the clouds defined by Eq. 9 (compare the “c” and “d” panels of Fig. B1, B2, B3, and B4). The 1 km averaging further improves the agreement between the data sets (Table 3).

Summarizing, using the thresholds (Eq. 5) to define the clouds makes the cloud data sets from CALIOP and ATLID comparable. Further adjustment will be needed for real ATLID data to compensate the effects of diurnal cycle (Noel et al., 2018; Chepfer et al., 2019; Feofilov and Stubenrauch, 2019) and for others, actual differences that will show up when ATLID actual data will be available, which are not included in the present study.

465





| Lidar      | CALIOP    |    |    |    |           |    |    |    | ATLID     |    |    |    |           |    |    |    |
|------------|-----------|----|----|----|-----------|----|----|----|-----------|----|----|----|-----------|----|----|----|
|            | Night     |    |    |    | Day       |    |    |    | Night     |    |    |    | Day       |    |    |    |
| Day/Night  | Ci        |    | Sc |    | Ci        |    | Sc |    | Ci        |    | Sc |    | Ci        |    | Sc |    |
| Averaged   | N         | Y  | N  | Y  | N         | Y  | N  | Y  | N         | Y  | N  | Y  | N         | Y  | N  | Y  |
| YES_YES    | 11        | 11 | 8  | 8  | 9         | 8  | 9  | 9  | 11        | 11 | 8  | 8  | 8         | 8  | 8  | 8  |
| NO_NO      | 84        | 84 | 86 | 87 | 84        | 84 | 86 | 87 | 85        | 84 | 87 | 87 | 84        | 84 | 87 | 87 |
| YES_NO     | 2         | 2  | 5  | 5  | 5         | 5  | 4  | 4  | 2         | 2  | 5  | 5  | 5         | 6  | 5  | 5  |
| NO_YES     | 3         | 3  | 0  | 0  | 3         | 2  | 1  | 0  | 3         | 3  | 0  | 0  | 2         | 2  | 0  | 0  |
| Tot. score | <b>95</b> | 95 | 95 | 95 | <b>91</b> | 91 | 95 | 95 | <b>95</b> | 95 | 94 | 94 | <b>91</b> | 91 | 95 | 95 |
| Bias       | 3         | 7  | -4 | -4 | 9         | 5  | -4 | -3 | 3         | 6  | -5 | -4 | 1         | 4  | -5 | -4 |
| R.m.s.     | 6         | 9  | 5  | 6  | 16        | 14 | 5  | 6  | 6         | 8  | 5  | 6  | 12        | 13 | 5  | 5  |

Table 3: Cloud detection statistics for CALIOP and ATLID in the case when the cloud is defined as  $SR(532nm, z) > 5$  and

470  $ATB(\lambda, z) - ATB_{mot}(\lambda, z) > 2.5 \times 10^{-6} m^{-1} sr^{-1}$  (Eq. 5).

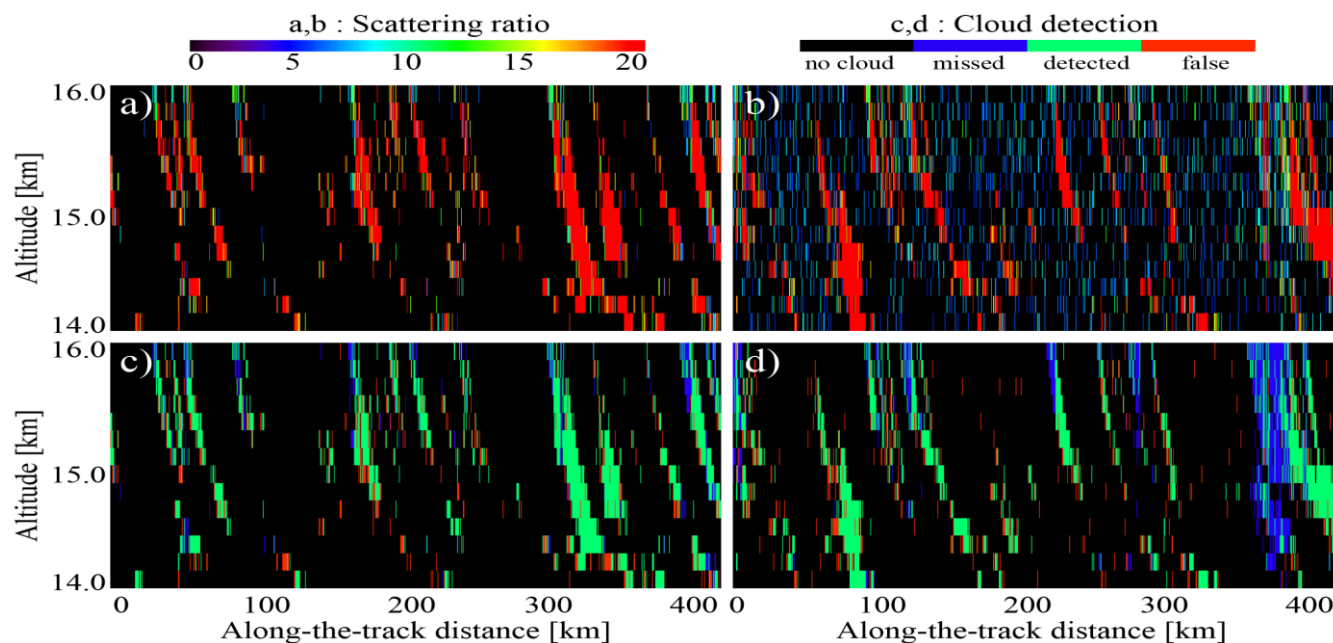

475 **Figure 8: Scattering ratio and cloud detection statistics estimated for cirrus clouds observed by CALIOP using Eq. 5: (a) scattering ratio, night; (b) scattering ratio, day; (c) cloud detection, night; (d) cloud detection, day. Note the color scale difference for (ab) and (cd).**

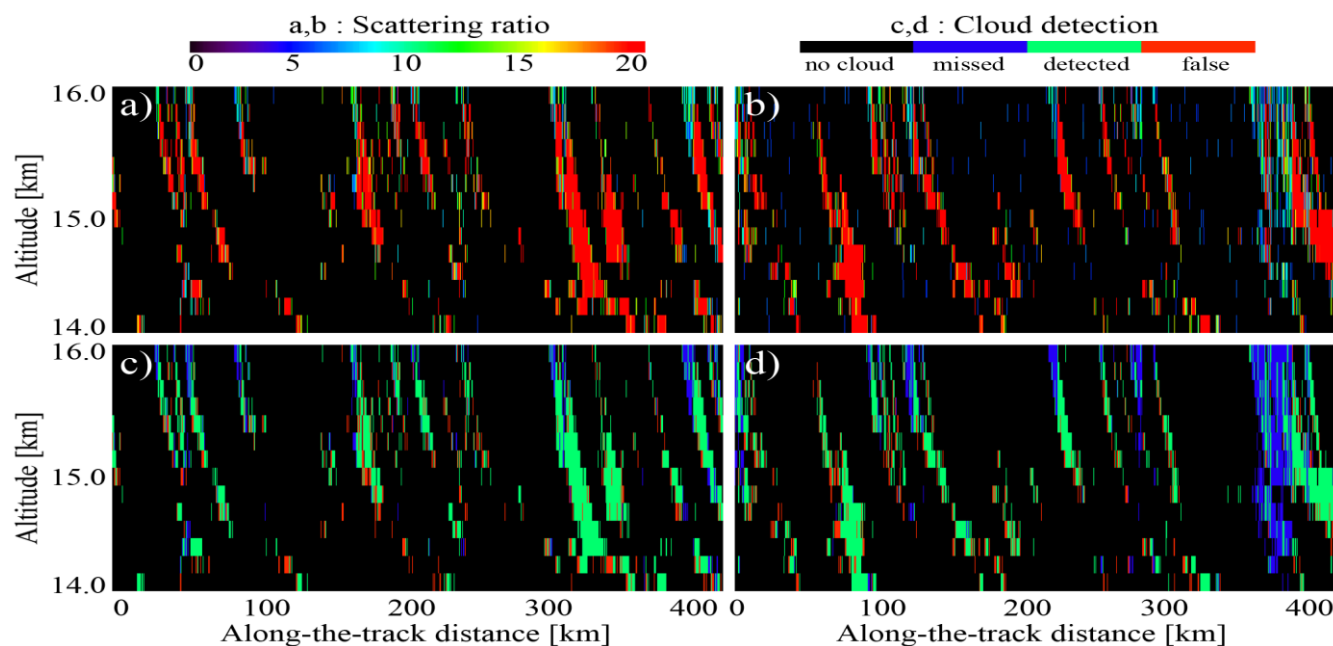

**Figure 9: Same as figure 8, but for ATLD**



#### 480 4.2 Numerical chain to simulate long-term lidar record and method to quantify time of emergence

The previous section showed that ATLID and CALIOP data may be merged to build a long-term dataset. Here we build a long-term space lidar synthetic dataset spanning more than 30 years, and examine when would a change in cloud properties attributable to human-induced warming would be detectable in this dataset if the climate model simulations are trusted. This approach is directly inspired by the one pioneered in (Chepfer et al. 2018), and later expanded in Perpina et al. (2021).

485 We use climate predictions from IPSL-CM6 (Boucher et al. 2020) and CESM2 (Community Earth System Model, Hurrell et al. 2013), two ocean-atmosphere-coupled GCMs which took part in the Climate Model Intercomparison Project (CMIP) phase 6 (Eyring et al., 2016). We use predictions starting in 2008 and ending in 2034 following the RCP8.5 scenario, that tracks the observed CO<sub>2</sub> emissions closely (Schwalm et al., 2020). Predictions are provided as monthly grids with spatial resolutions of 1.27°x2.5° on 79 vertical levels (IPSL-CM6) and 1.25°x0.94° on 40 vertical levels (CESM). On these predictions of  
490 atmospheric conditions, we apply the COSPI.4 lidar simulator (Sect. 3.2), which generates on similar spatial grids the monthly-averaged cloud properties that would be observed by a spaceborne lidar flying over the simulated atmosphere.

From the simulated cloud properties, we considered two climate diagnostics whose trend should be related to climate change: first the fraction of opaque clouds  $C_{\text{opaque}}$ , defined as the number of lidar profiles in which an opaque cloud is detected in a given lat/lon grid box, divided by the total number of profiles sampled in the same grid box. Opaque clouds are responsible  
495 for the majority of cloud radiative effect in the Tropics (Vaillant de Guélis et al., 2017) and the cloud amount has been identified as one of the main drivers of cloud feedbacks on climate (Zelinka et al., 2016), thus the fraction of opaque clouds should be closely tied to climate change. Second, we considered the altitude of full attenuation  $Z_{\text{opaque}}$  (Guzman et al. 2017), averaged over all opaque profiles in every grid box. The vertical distribution of clouds is closely linked to their longwave radiative impact and to climate change (Vaillant de Guélis et al., 2018), and their altitude is expected to increase by several hundred  
500 meters per century (Richardson et al., 2022). Altitude is among the cloud properties whose change is expected to be detectable the earliest using active remote sensing (Chepfer et al., 2014; Takahashi et al., 2019; Aeronson et al., 2022).

From the GCM predictions, the COSP lidar simulator generates monthly grids of  $C_{\text{opaque}}$  and  $Z_{\text{opaque}}$ , that we spatially average over the Tropics (30°S-30°N) to get monthly time series. We deseasonalize those time series to get their monthly anomalies over the 2008–2034 period. For any time  $t$  along these time series, the record length is equivalent to the period between 2008-  
505 01-01 and  $t$ , and we computed the trend  $w(t)$  as the linear regression of the time series of anomalies over that period. The uncertainty  $\sigma_w(t)$  in the trend  $w(t)$  at a time  $t$  was computed, as in Chepfer et al. (2018), as  $\sigma_w(t) = \sigma_N \sqrt{\frac{1+\varphi}{1-\varphi}} n^{-\frac{3}{2}}$ , with  $n$  the number of years of the record at time  $t$ ,  $\varphi$  the lag-1 autocorrelation coefficient of the series between 0 and  $t$ , and  $\sigma_N$  the standard deviation of the noise remaining in the series between 0 and  $t$  once it has been deseasonalized and the auto-correlated part removed.

510 The following analysis focuss on the tropical regions (30°S-30°N), where the atmospheric circulation will be impacted by the weakening of the Hadley and Walker circulations expected in the upcoming century by most climate predictions (Davis and Rosenlof, 2012; Su et al., 2014; Kjellsson, 2015; Chemke, 2021). These changes will have important effects on the spatial



distribution of tropical clouds (Su et al., 2014), which provide the basis for our climate diagnostics. Cloud opacity is one of the cloud properties most closely linked to their radiative impact (Zelinka et al. 2012), which explains why our diagnostics are based on the properties of opaque clouds (as in Perpina et al. 2021). The results below assume it will be possible to process ATLID measurements in such a way that CLIMP and GOCCP cloud properties are consistent. 

#### 4.3. How many years of ATLID observation are required in addition to CALIPSO to evaluate climate model prediction of cloud changes?

Figure 10 shows how the uncertainty in the retrieved trend for  $C_{\text{opaque}}$  changes with the length of the record of lidar-based cloud properties, starting in 2008, according to predictions from IPSL-CM6 (blue) and CESM1 (orange). The uncertainty is generally the largest and fluctuates most when the record is short, and decreases and stabilizes as the record gets longer. At any time  $t$ , if we require a 95% confidence level in the prediction, the real trend will lie in the  $w(t) \pm Z_{0.95} \sigma_w(t)$  interval. The sign of the trend will be robust once  $\left| \frac{w(t)}{\sigma_w(t)} \right| > 2$ . This is when the uncertainty of the trend becomes small compared to the trend itself, and marks the time of emergence of cloud change induced by anthropogenic warming. This occurs earlier for strong, stable trends, and might never occur for very small trends or trends whose sign changes over time. Times of emergence in the  $C_{\text{opaque}}$  time series are indicated in Fig. 10 with triangles for three confidence levels (50, 70 and 95%). Reaching a reliable sign requires a longer record if the required confidence level is strong. 

According to predictions from IPSL-CM6 (blue), a reliable trend should emerge from the natural variability at a 50 to 70% confidence level between 2030 and 2032. In other words, IPSL-CM6 predicts that revealing a reliable long-term trend in the fraction of opaque clouds would require an uninterrupted spaceborne lidar record of 22 years, which would be achievable if EarthCARE operates for at least 7 years. Reaching 95% confidence levels on the retrieved trend would require extending the record beyond 25 years, most probably through another spaceborne lidar mission further in time. CESM1, meanwhile, predicts that a reliable long-term trend in the fraction of opaque clouds (at similar confidence levels between 50 and 70%) would be reached between 2025 and 2027, requiring 2 to 4 years of EarthCARE operation. A highly reliable trend (95% confidence levels) would be detectable in 2029, after 6 years of EarthCARE operation. In summary, if a 50% confidence level is acceptable, detecting a reliable trend would either be possible within the EarthCARE nominal operation timeframe (2 years after launch), according to CESM1, or would require EarthCARE to operate 4 years beyond its planned lifetime, according to IPSL-CM6. 

If we consider the  $Z_{\text{opaque}}$  diagnostic (Fig. 11), the IPSL-CM6 model now predicts a trend will be detectable at high 95% confidence levels in 2024, i.e. one year into EarthCARE's nominal operation period. Meanwhile, according to CESM1 predictions, detecting a reliable trend (even at a modest 50% confidence level) would require EarthCARE operating for eight years, 5 years beyond its nominal operation timeframe. This very fast detection of a reliable  $Z_{\text{opaque}}$  trend predicted by IPSL-CM6 is consistent with how this model expects important and fast changes in the vertical distribution of opaque clouds in the Tropics (Perpina et al. 2021).

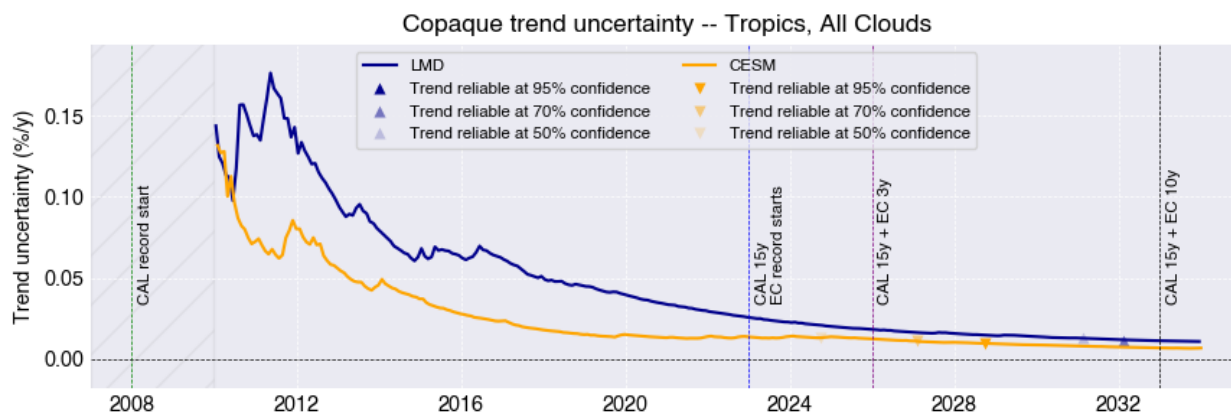

545

Figure 10 Evolution of the uncertainty in the  $C_{\text{opaque}}$  trend as a function of the length of the spaceborne lidar record, according to atmospheric conditions predicted by IPSL-CM6 (blue) and CESM (orange) in the period between 2008 and 2034 following the RCP85 scenario. The first two years of the record (2008-2010) are masked as the record is too short to be reliably deseasonalized. CALIPSO's planned end of operation (2023) is marked by a vertical blue line. Supposing EarthCARE begins operation right afterwards, its nominal 3-years operation point is marked by a vertical purple line, and an optimistic 10-years operation point is marked by a vertical black line.

550

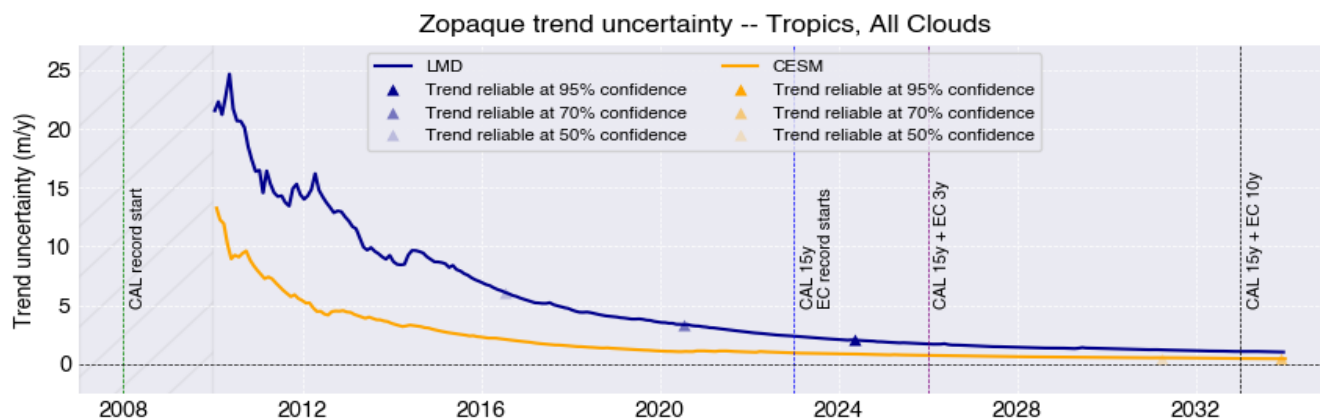

Figure 11 : Same as Fig. 10, but for the altitude of opacity  $Z_{\text{opaque}}$  instead of  $C_{\text{opaque}}$ .



555 We sum these results up in Table 4, which in addition provides similar record lengths to detect reliable trends when considering grid boxes dominated by either low or high clouds. Tropical low opaque clouds include sparse shallow cumulus (Konsta et al., 2012) and optically thicker stratocumulus along the West coasts of continents (Guzman et al., 2017), both confined to the boundary layer and most frequent in subsidence regions. By contrast, tropical high opaque clouds are more localized and strongly correlated with deep convection. Since both kinds of clouds are driven by very different processes, it is not  
 560 unreasonable to assume they will probably evolve differently in the upcoming century, which justifies their separate studies. In practice, we identified grid boxes dominated by low clouds as those where  $Z_{\text{opaque}}$  was below 3 km, and high-cloud grid boxes as those where  $Z_{\text{opaque}}$  was above 3 km. The results, shown in Table 4, suggest that the nominal ATLID/EarthCARE operation will be enough to validate or invalidate the trends in opaque tropical low clouds predicted by CESM. It will be possible to validate or invalidate others model-based cloud predictions only if EarthCARE performs beyond its nominal  
 565 lifetime (which is not impossible, as CALIPSO demonstrated), or if measurements from a follow-up spaceborne lidar mission after ATLID are included in the cloud profile record. These results are consistent with the trends, uncertainties and times of emergence found when conducting a relatively simpler comparison of HadGEM2-A predictions in current vs +4K conditions (Chepfer et al., 2018).

|                         | $C_{\text{opaque}}$ |                | $Z_{\text{opaque}}$ |                 |
|-------------------------|---------------------|----------------|---------------------|-----------------|
|                         | IPSL-CM6            | CESM           | IPSL-CM6            | CESM            |
| All clouds              | 2030 (7 years)      | 2027 (4 years) | 2021                | 2034 (11 years) |
| Low clouds only (<3km)  | No trend            | 2024 (1 year)  | No trend            | 2025 (2 years)  |
| High clouds only (>3km) | 2027 (4 years)      | 2031 (8 years) | 2018                | No trend        |

Table 4: When will a spaceborne lidar record starting in 2008 be long enough to enable a reliable detection (at 70% confidence level) of  $C_{\text{opaque}}$  or  $Z_{\text{opaque}}$  trends according to predictions from IPSL-CM6 or CESM. The required years of EarthCARE operation are shown in parentheses, supposing they begin in 2023. The monthly evolution of the trend uncertainties for low and high clouds are provided in Figures C1 and C2 of the Appendix C.

As stated upfront, these results depend on rather strong hypotheses of perfect continuity and perfect intercalibration between the consecutive spaceborne lidars that provide the measurements from which the cloud properties are derived. Imperfect  
 575 continuity would occur if, for instance, EarthCARE starts operation later than CALIOP stops. The missing years in the record would delay the detection of a reliable trend by at least the same time period (Chepfer et al., 2018). Perfect intercalibration supposes the effects of instrumental differences in technical specifications (wavelengths, pulse energy, field of view, etc.) and orbital characteristics (local time of overpass, altitude) on lidar measurements are reconciled somehow. For instance, ATLID operates at 355nm and CALIOP at 532nm, and the impact this has on measurements can be reconciled by converting ATLID  
 580 signal at 532nm as done in the current study, but the costs of this conversion are not completely understood and will require re-examination when actual ATLID data will be available. Imperfect intercalibration could lead to offsets in one spaceborne



lidar's record compared to the other, and would increase the uncertainties of the retrieved trends. Increased delays between the operation of both instruments would complicate their intercalibration. The different local times of overpass (01:30/13:30 local Solar time, LST, for CALIPSO, 06:00/18:00 LST for EarthCARE) are also quite problematic, since each instrument will sample clouds at a different phase of their diurnal cycle (Noel et al., 2018; Chepfer et al., 2019; Feofilov and Stubenrauch, 2019). In particular, this will impact high clouds related to deep convection that exhibit a marked diurnal cycle. It is out of the scope of the present work to evaluate how this change could bias the retrieved long-term trends.

Finally, the times of emergence presented here must not be understood as definite but as predictions by climate models. It is worth noting, for instance, that, according to predictions from IPSL-CM6, a reliable trend should already be readily detectable in the existing record of  $Z_{\text{opaque}}$  that is today only built on CALIOP/CALIPSO (Table 4). Such a trend has not been identified yet. This is consistent with the fact that in current climate conditions IPSL-CM6 overestimates the altitude of opaque clouds in tropical convective regions, and brings them significantly higher (+2km) near the end of 21st century (Perpina et al., 2021). Such rapid changes are not present in CESM predictions. These important model differences highlight the crucial need for continued long-term cloud lidar observations able to monitor the actual cloud changes, and disambiguate model predictions.

## 5. Conclusions

This study presents the physical basis for the ATLID Cloud CLIMate Product named CLIMP. This product builds on previous work on CALIPSO, a space lidar dedicated to cloud and aerosol observations like ATLID. CALIPSO data have been being used for 16 years to evaluate the description of clouds in climate models using a dedicated product named GOCCP and a dedicated lidar simulator named COSP/lidar. The present work also builds on recent work on AEOLUS, a space lidar with HSRL capability operating in the UV like ATLID. Based on this legacy, we have defined the CLIMP short-term (ST) and CLIMP long-term (LT) products, both dedicated to cloud climate studies. Both contain the same variables as GOCCP (see Table D1 in Appendix D) on the same horizontal and vertical resolutions, but CLIMP-ST and CLIMP-LT have different cloud detection thresholds because they aim to tackle slightly different science objectives.

The CLIMP-ST product is designed to make full use of ATLID capability to evaluate cloud description in climate models. CLIMP-ST is expected to contain optically thin cloud detected in daytime conditions at full resolution that were not observed by former space lidars at such high spatial resolutions during day time. This new information, if confirmed in actual data, will help make progress on our current understanding of processes tied to thin ice clouds in the climate system. It will help evaluate the description in climate models of optically thin clouds in regions where they are frequent and important for climate, for example in the tropics and polar regions.

The CLIMP-LT product is designed to detect the same clouds as CALIPSO-GOCCP. Merging CLIMP-LT with GOCCP will allow building a multi-decade cloud profile record, useful to monitor the cloud inter-annual natural variability and cloud changes induced by human-caused climate warming. This record, if quality is sufficient, will be useful to evaluate climate prediction of cloud changes and to help reduce uncertainties in model-based climate feedbacks and climate sensitivity.





To design CLIMP-ST and CLIMP-LT, we examined the differences between CALIOP and ATLID, space lidars that operate at different wavelengths and use different observation techniques and detectors. We sought to answer two questions: (1) Does the HSRL capability of ATLID provide any advantage compared to a traditional space lidar for climate studies? (2) Does the cloud product retrieved from ATLID observations compare well with the one retrieved from CALIOP observations, and if so, how many years of ATLID observations are needed to detect trends in opaque cloud cover or altitude of opaque clouds, assuming ATLID operation will follow CALIOP without a gap?

To answer these questions, we coupled the outputs of the 3DCLOUD model with the COSP2 simulator and added instrumental noise for two cloud scenes, thin cirrus clouds at ~15 km in the tropics and stratocumulus clouds at ~1km height. CALIOP and ATLID orbits over these cloud scenes were simulated both for nighttime and daytime conditions, at full vertical and horizontal (1/3km) resolution and at 1 km horizontal resolution. Then, we applied a wavelength conversion algorithm to ATLID observations to convert UV lidar profiles into 532nm lidar profiles.

We addressed the first question for CLIMP-ST. We showed that the lower daytime noise of ATLID allows applying more sensitive thresholds for cloud detection ( $SR(532nm, z) > 3$ ;  $ATB(532nm, z) - ATB_{mol}(532nm, z) > 1.5 \times 10^{-6} m^{-1} sr^{-1}$ ) than for CALIPSO at full spatial resolution in day time without introducing a bias. This suggests that ATLID may provide new information on optically thin clouds at daytime conditions at full spatial resolution.

We addressed the second question for CLIMP-LT. We search for consistency between ATLID and CALIPSO-GOCCP in cloud detection, therefore we applied the same cloud detection thresholds ( $SR(532nm, z) > 5$ ;  $ATB(532nm, z) - ATB_{mol}(532nm, z) > 2.5 \times 10^{-6} m^{-1} sr^{-1}$ ) to both instruments, then their nighttime cloud products are comparable, whereas the daytime CALIOP clouds are characterized by somewhat higher false detection rate. This suggests ATLID and CALIPSO might observe the same clouds, with some adjustment in the cloud detection scheme. Then we analyzed 24 years of predictions from two general circulation models (IPSL-CM6 and CESM2) in the RCP85 scenario, coupled with the COSP lidar simulator. We show that IPSL-CM6 predicts the opaque cloud cover trend detection will require 7 years of ATLID operation besides the existing CALIOP cloud data set, whereas CESM2 predicts the opaque cloud cover trend can be detected in 4 years. For the clouds above 3 km altitude, these numbers change to 4 and 8 years, respectively, and for the altitudes below 3 km the IPSL-CM6 clouds indicate no trend and CESM cloud trend detection will require one year of ATLID operation. These differences in climate predictions highlight the need for a multi-decade cloud lidar record.

The current results rely on a comparison of exactly the same atmospheric scenes “virtually observed” by two space lidars and they were obtained in the framework of comparing the cloud detection capabilities of these two instruments. However, the comparison of the actual ATLID measurements with actual CALIOP ones will face with an uncompensated difference linked to the local solar time sampling by CALIOP and ATLID. The difference in the diurnal cycle will bias the detected cloud amount and height. This is a separate issue that should be compensated for and this should be a subject of a separate work.

Moreover, the comparison of actual ATLID measurements with CALIOP ones will probably face unexpected differences other than the ones foreseen in this paper. Therefore, the CLIMP algorithm will require an adjustment after ATLID launch to take those into account.



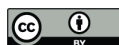

That being said, this study suggests that it is likely that ATLID will provide new information useful to help evaluate cloud description in climate models beyond the existing space lidar observations. Moreover, merging the ATLID data with the  
650 CALIOP data will probably be helpful to monitor cloud response to climate warming



## Appendix A

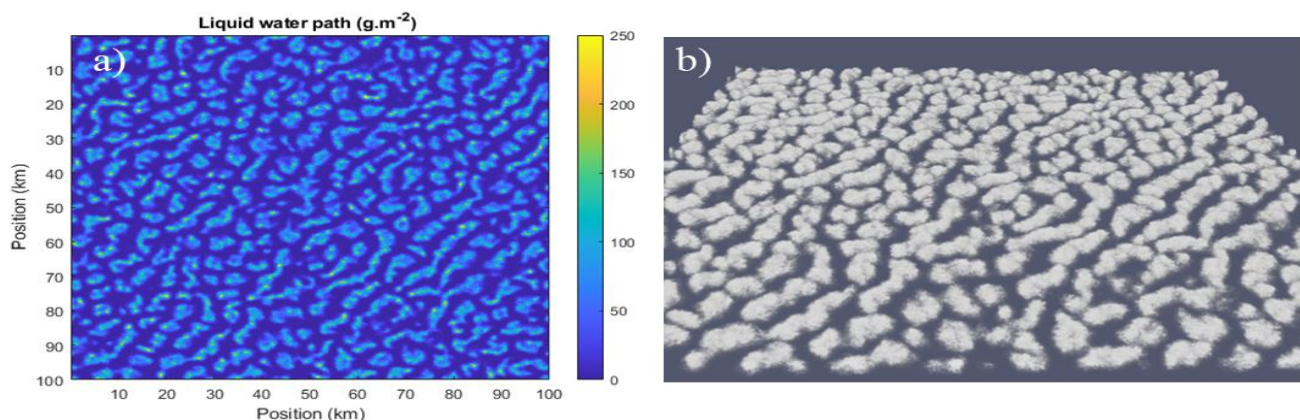

Figure A1: Examples of the stratocumulus generated with 3DCLOUD : (a) 2-D ice water path and (b) its volume rendering.

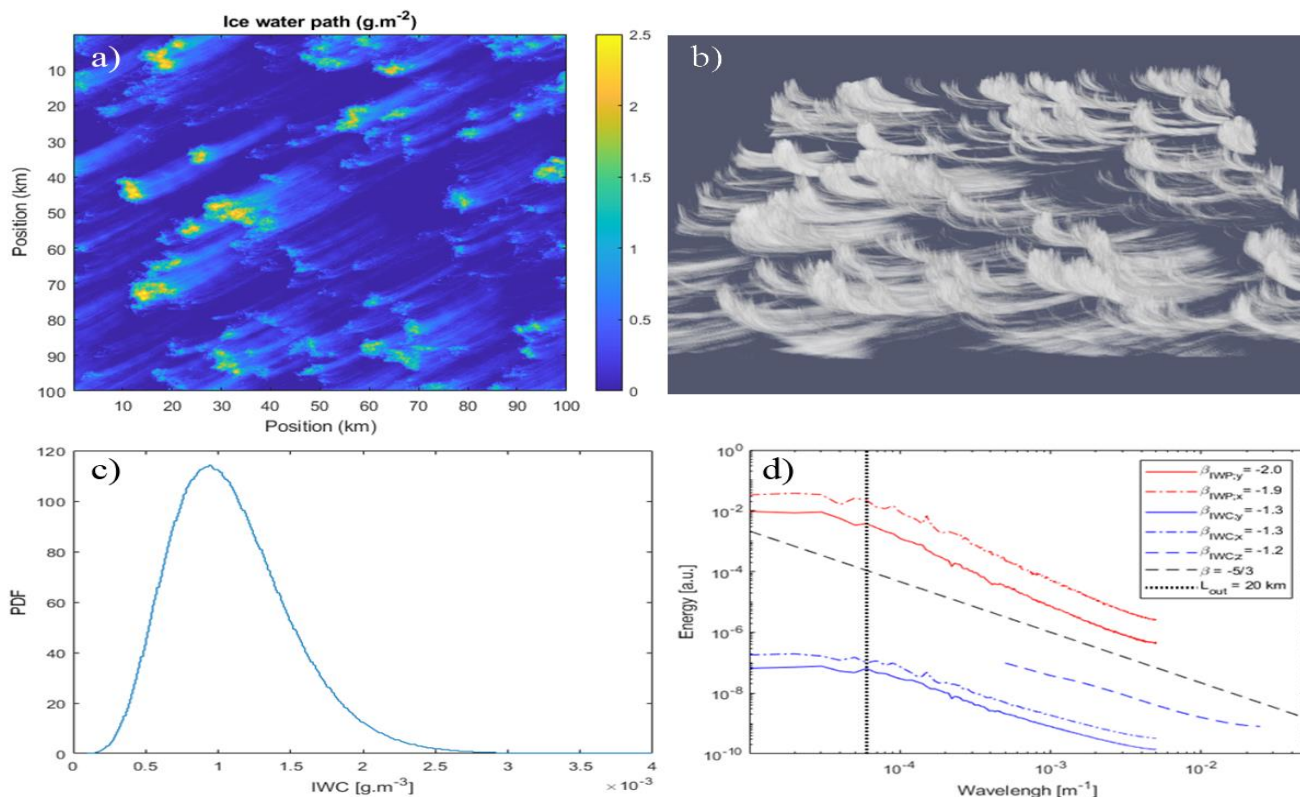

Figure A2: Examples of cirrus generated with 3DCLOUD\_V3 : (a) ice water path and (b) its volume rendering; (c) IWC PDF ; (d) Mean 1-D power spectrum of IWP (red curves) and of IWC (blue curve) following x,y and z direction (solid, dashdot and dashed line, respectively). A theoretical power spectrum with spectral slope  $\beta = -5/3$  is added (dashed black line). Dotted vertical black line indicates the outer scale  $L_{out} = 20$  km.



660 **Appendix B**

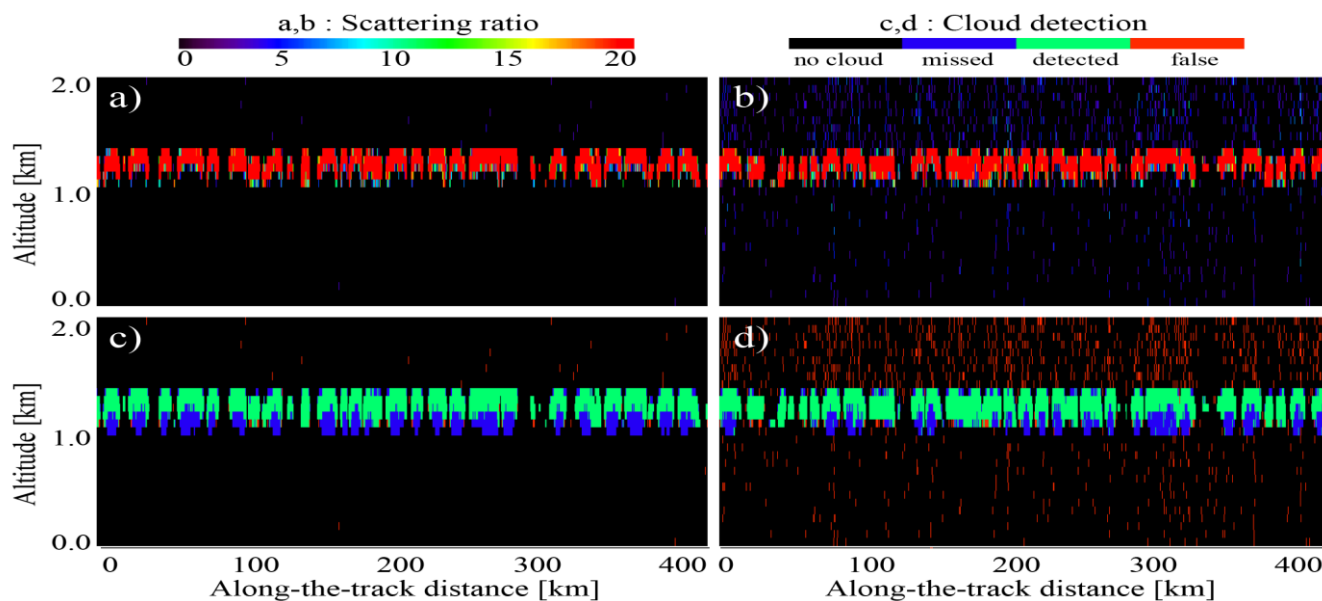

**Figure B1:** Scattering ratio and cloud detection statistics estimated for stratocumulus clouds observed by CALIOP using Eq. 9: (a) scattering ratio, night; (b) scattering ratio, day; (c) cloud detection, night; (d) cloud detection, day.

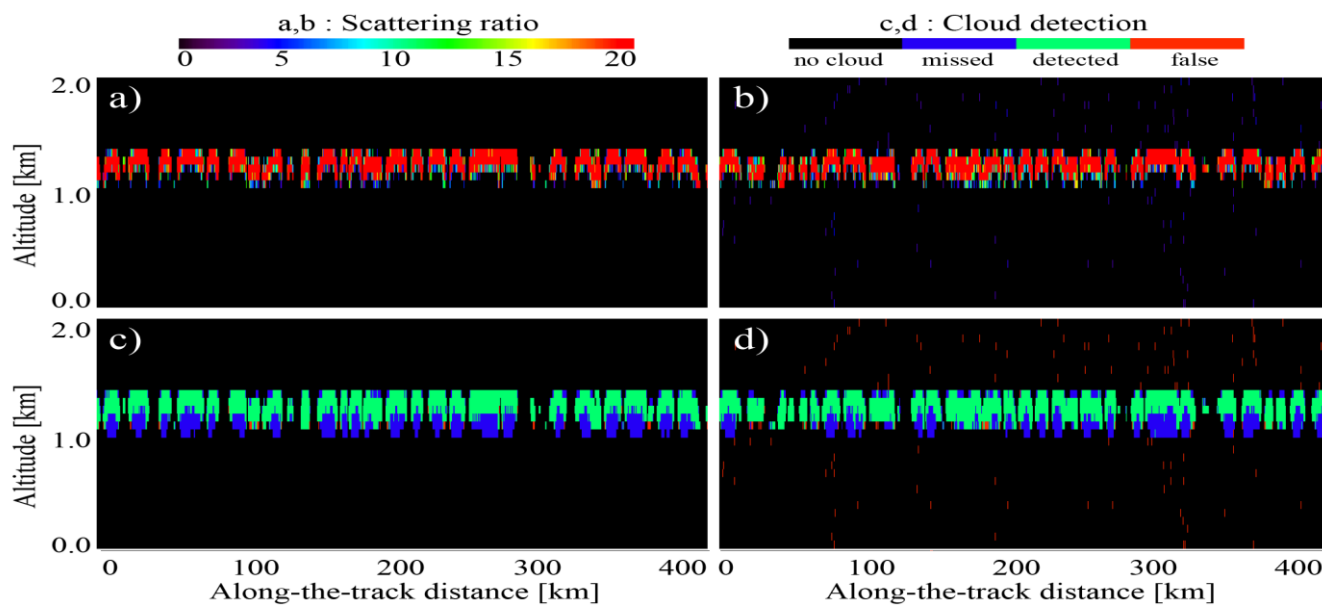

665 **Figure B2:** Same as Fig. B1, but for ATLD.

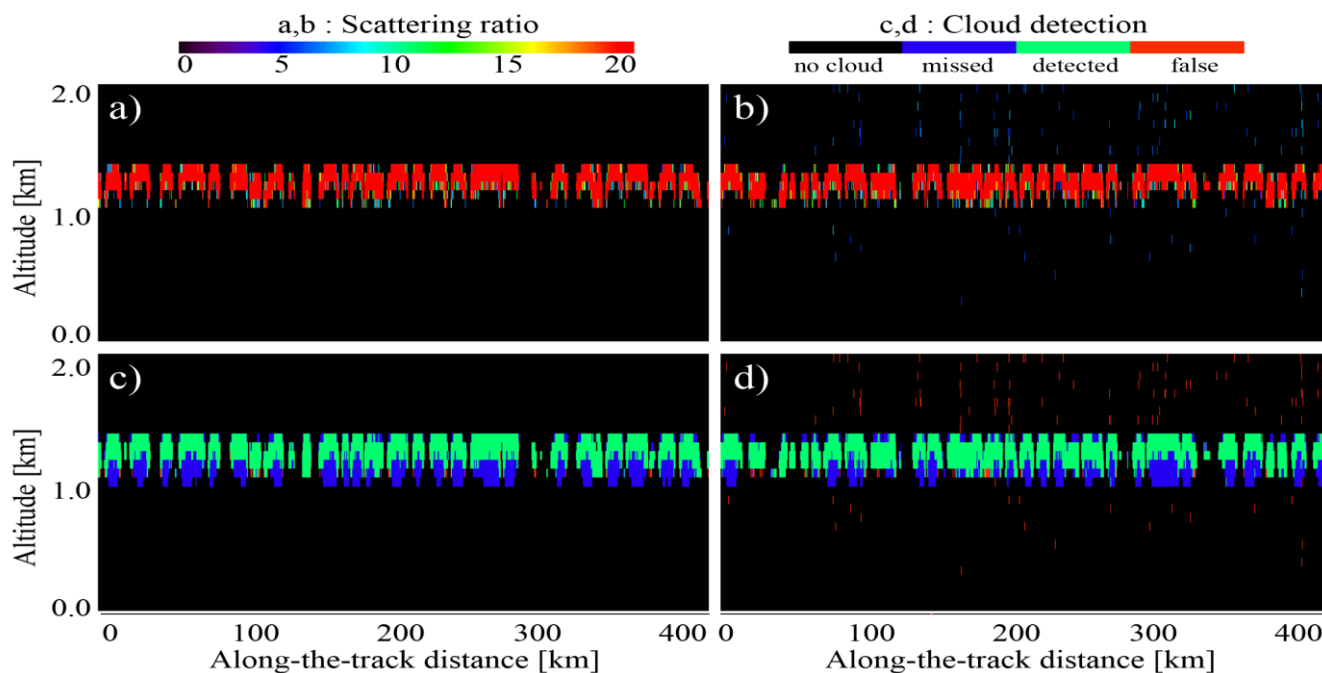

Figure B3: Scattering ratio and cloud detection statistics estimated for stratocumulus clouds observed by CALIOP using Eq. 5: (a) scattering ratio, night; (b) scattering ratio, day; (c) cloud detection, night; (d) cloud detection, day.

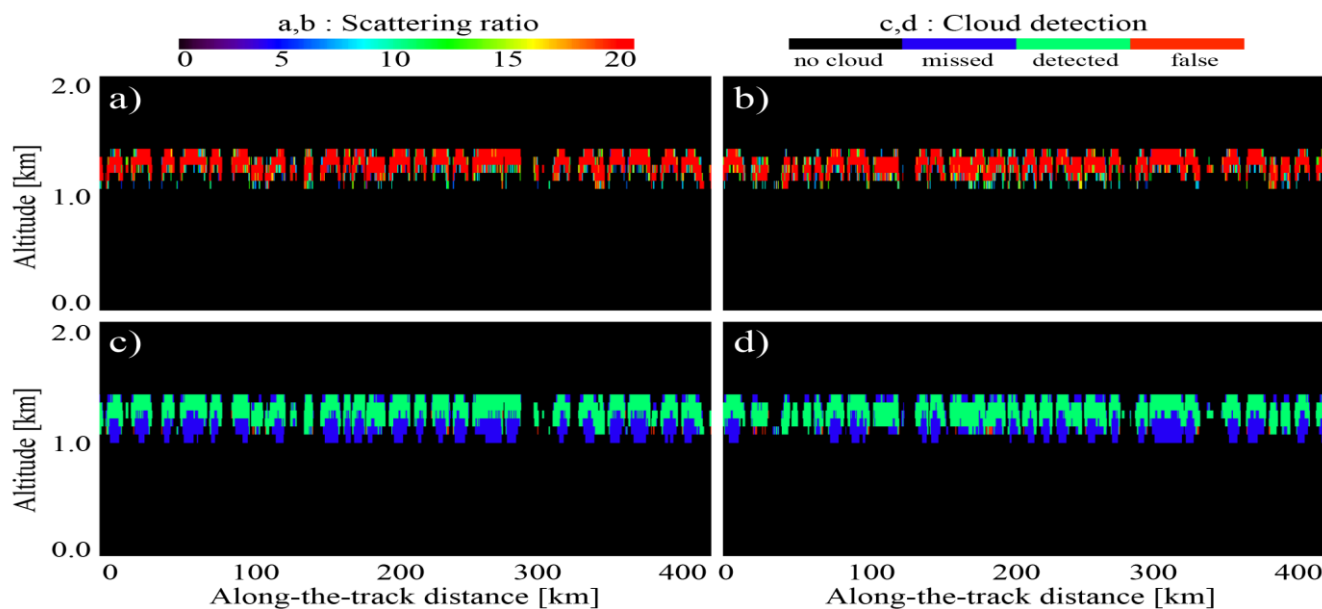

670 Figure B4: Same as Fig. B3, but for ATLID.



### Appendix C

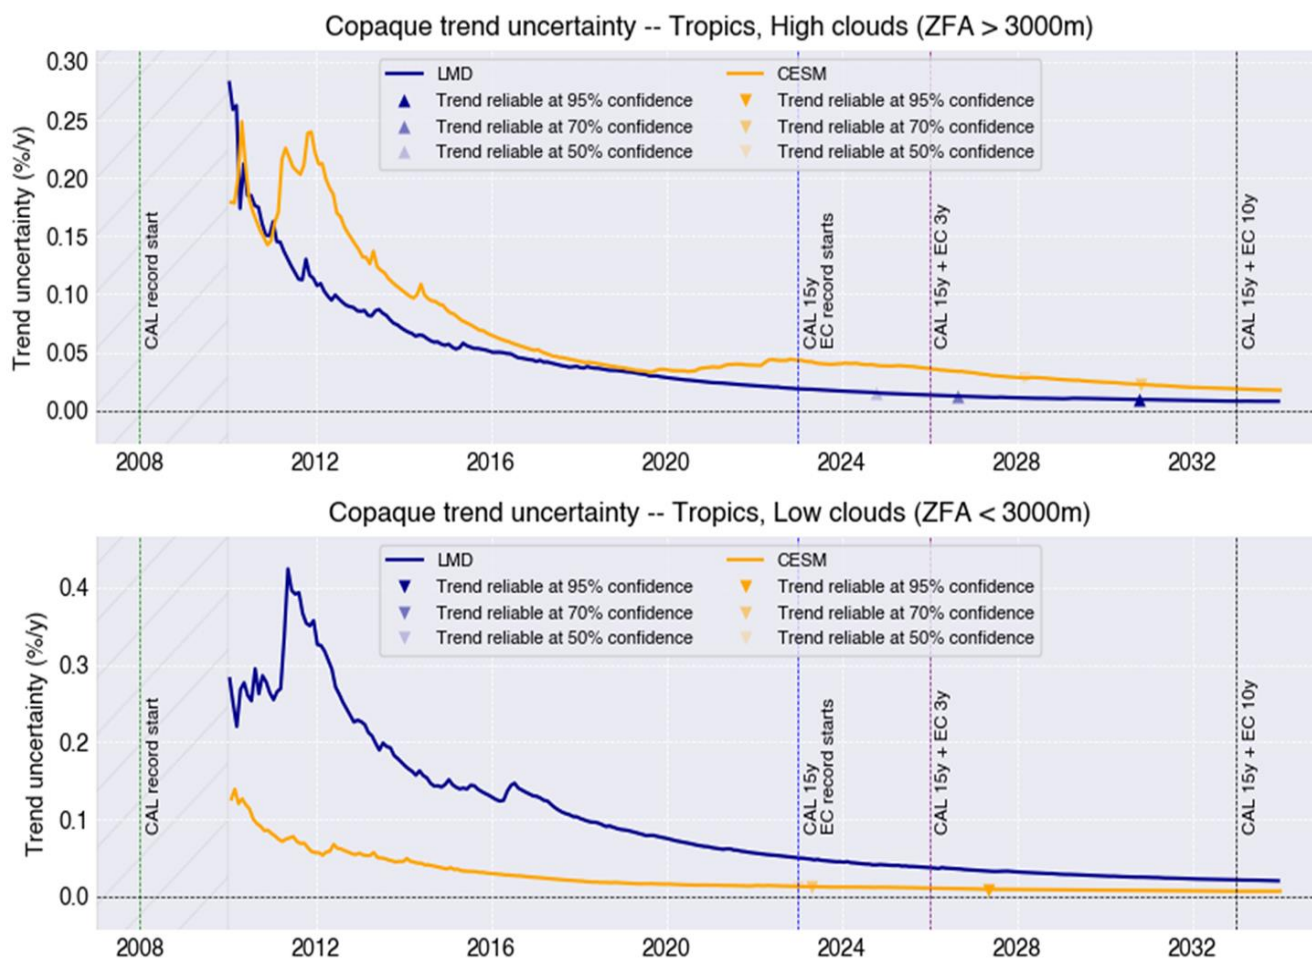

Figure C1: Same as Fig. 10, but with a separate analysis of high-levels clouds (top) and low-level clouds (bottom)



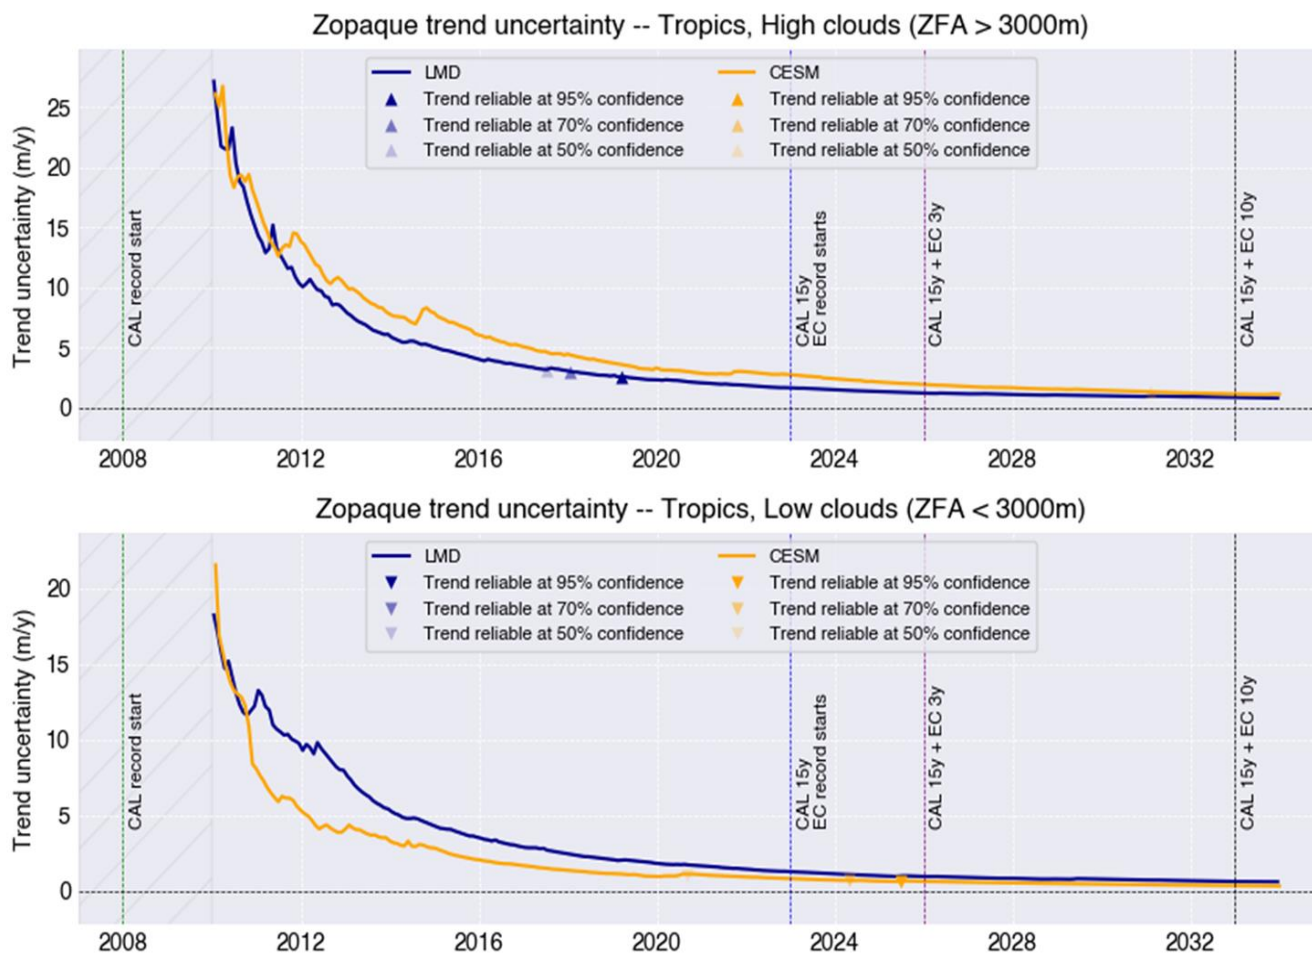

Figure C2: Same as Fig. 11, but with a separate analysis of high-levels clouds (top) and low-level clouds (bottom)



## Appendix D

| Variable Name             | Unit            | Dimension           | Remarks                                                                                                                                                        |
|---------------------------|-----------------|---------------------|----------------------------------------------------------------------------------------------------------------------------------------------------------------|
| Time.UTC                  | Seconds         | Ntime               | same unit as in ATLID L1B file                                                                                                                                 |
| Altitude                  | Meters          | NZ                  |                                                                                                                                                                |
| Levels                    | Meters          | Nlev (4)            |                                                                                                                                                                |
| Flags                     | Unitless        | Nflags (6)          |                                                                                                                                                                |
| Lon                       | Degree          | Ntime               |                                                                                                                                                                |
| Lat                       | Degree          | Ntime               |                                                                                                                                                                |
| Surface_elevation         | Meters          | Ntime               | from DEM and/or lidar ground return                                                                                                                            |
| Temperature               | Dereee C        | Ntime x NZ          | From ECMWF in ATLID L1B                                                                                                                                        |
| Pressure                  | hPa             | Ntime x NZ          | From ECMWF in ATLID L1B                                                                                                                                        |
| Scattering_ratio          | Unitless        | Ntime x NZ          |                                                                                                                                                                |
| Layer_identification_mask | Unitless (int8) | Ntime x NZ          | See Table D2                                                                                                                                                   |
| Quality_flags             | 0/1 (int8)      | Ntime x NZ x Nflags | See Table D3                                                                                                                                                   |
| Cloud_presence            | 0/1 (int8)      | Ntime x Nlev        | nlev cloud flag at specific vertical levels<br>nlev=0 - anywhere in the profile<br>nlev=1 - at low levels<br>nlev=2 - at mid levels<br>nlev=3 - at high levels |

680 Table D1: Variable definitions for ATLID cloud product. Variables are of type Real (float64) unless specified otherwise. Shaded variables are used as dimensions.

| Bin     | Corresponding SR values                                                                                                                                                                                                                                                                     |    |    |    |    |    |    |    |    |    |   |   |    |    |    |    |    |    |    |
|---------|---------------------------------------------------------------------------------------------------------------------------------------------------------------------------------------------------------------------------------------------------------------------------------------------|----|----|----|----|----|----|----|----|----|---|---|----|----|----|----|----|----|----|
| 0       | Fully attenuated region: $SR < SR\_bins[0]$ (default 0.01)                                                                                                                                                                                                                                  |    |    |    |    |    |    |    |    |    |   |   |    |    |    |    |    |    |    |
| 1       | Clear-sky region: $SR\_bins[0] < SR < SR\_bins[1]$ (default value 1.2)                                                                                                                                                                                                                      |    |    |    |    |    |    |    |    |    |   |   |    |    |    |    |    |    |    |
| 2       | Unclassified region: $SR\_bins[1] < SR < SR\_bins[2]$ (default value 3.0)                                                                                                                                                                                                                   |    |    |    |    |    |    |    |    |    |   |   |    |    |    |    |    |    |    |
| 3 to 11 | Cloud region: $SR > SR\_bins[2]$ . The actual bin number provides information on SR intensity within the cloud, with 3 = weakest signal and 11=strongest signal. Defaults:                                                                                                                  |    |    |    |    |    |    |    |    |    |   |   |    |    |    |    |    |    |    |
|         | <table border="1" style="margin-left: 40px;"> <tr> <td>3</td> <td>4</td> <td>5</td> <td>6</td> <td>7</td> <td>8</td> <td>9</td> <td>10</td> <td>11</td> </tr> <tr> <td>5</td> <td>7</td> <td>10</td> <td>15</td> <td>20</td> <td>25</td> <td>30</td> <td>40</td> <td>50</td> </tr> </table> | 3  | 4  | 5  | 6  | 7  | 8  | 9  | 10 | 11 | 5 | 7 | 10 | 15 | 20 | 25 | 30 | 40 | 50 |
| 3       | 4                                                                                                                                                                                                                                                                                           | 5  | 6  | 7  | 8  | 9  | 10 | 11 |    |    |   |   |    |    |    |    |    |    |    |
| 5       | 7                                                                                                                                                                                                                                                                                           | 10 | 15 | 20 | 25 | 30 | 40 | 50 |    |    |   |   |    |    |    |    |    |    |    |

Table D2: Layer identification mask description

| Flag value | Explanation                                                                                                                                                                                                                                  |
|------------|----------------------------------------------------------------------------------------------------------------------------------------------------------------------------------------------------------------------------------------------|
| 0          | Missing or unreliable data, according to cross-talk information from ATLID level 1b. If Mie, Rayleigh, Geo-localization or atmospheric quality are not good enough, the profile will be rejected and be considered as missing or unreliable. |
| 1          | Data located below the surface elevation                                                                                                                                                                                                     |
| 2          | Noisy data, according to molecular calibration. If the calibration R is not within range, the entire profile is flagged as noisy.                                                                                                            |
| 3          | Conflicting cloud detection indicators in the upper troposphere<br>$SR < 3$ and $\Delta ATB > 1.5e-6 \text{ m}^{-1} \text{ sr}^{-1}$ .                                                                                                       |
| 4          | Presence of very bright clouds ( $SR > 50$ ) anywhere in the profile                                                                                                                                                                         |
| 5          | Negative SR ( $SR < 0$ ). Can appear in fully attenuated cloud mask ( $SR < 0.01$ )                                                                                                                                                          |

685 Table D3: Quality flag indicator



### **Author contribution**

HC, VN, and AF: conceptualization, investigation, methodology, and validation; FS: calculating cloud distributions; AF: data curation and formal analysis; AF: writing original draft; AF, HC and VN: review and editing.

### **Competing interests**

690 The authors declare that they have no conflict of interest.

### **Acknowledgements**

This work is supported by the Centre National de la Recherche Scientifique (CNRS) and by the Centre National d'Etudes Spatiales (CNES) through the Expecting EarthCARE, Learning from A-Train (EECLAT) project. The authors are grateful to Dr. Valery Shcherbakov (Laboratoire de Météorologie Physique, Université Clermont Auvergne, Aubière, France) for the  
695 discussion of multiple scattering coefficient in application to CALIOP and ATLID.





## References

- Ackermann, J.: The Extinction-to-Backscatter Ratio of Tropospheric Aerosol: A Numerical Study, *J. Atm. Ocean. Techn.*, 15(4), 1043-1050, [https://doi.org/10.1175/1520-0426\(1998\)015<1043:TETBRO>2.0.CO;2](https://doi.org/10.1175/1520-0426(1998)015<1043:TETBRO>2.0.CO;2), 1998.
- 700 Aeronson, T., Marchand, R., Chepfer, H., Medeiros, B.: When Will MISR Detect Rising High Clouds? *J. Geophys. Res. Atm.*, 127(2), e2021JD035865, <https://doi.org/10.1029/2021JD035865>, 2022.
- Alkasem A., Szczap, F., Cornet, C., Shcherbakov, V., Gour, Y., Jourdan, O., Labonnote, L. C., and Mioche, G.: Effects of cirrus heterogeneity on lidar CALIOP/CALIPSO data, *JQSRT*, 202, 38-49, doi:10.1016/j.jqsrt.2017.07.005, 2017.
- Bodas-Salcedo, A., Webb, M. J., Bony, S., Chepfer, H, J.-I. Dufresne, J.-L., Klein, S. A., Zhang, Y., Marchand, R., Haynes, J.
- 705 M., Pincus, R., and John, V. O.: COSP, Satellite simulation software for model assessment, *Bull. Am. Meteorol. Soc.*, 1023-1043, doi:10.1175/2011BAMS2856.1, 2011.
- Boucher, O., Servonnat, J., Albright, A. L., Aumont, O., Balkanski, Y., Bastrikov, V., et al.: Presentation and Evaluation of the IPSL-CM6A-LR Climate Model. *Journal of Advances in Modeling Earth Systems*, 12(7). <https://doi.org/10.1029/2019MS002010>, 2020.
- 710 Cesana, G., Del Genio, A. D., and Chepfer, H.: The Cumulus And Stratocumulus CloudSat-CALIPSO Dataset (CASCCAD), *Earth Syst. Sci. Data*, 11, 1745–1764, <https://doi.org/10.5194/essd-11-1745-2019>, 2019.
- Chemke, R.: Future changes in the Hadley circulation: The role of ocean heat transport, *Geophys. Res. Lett.*, 48, e2020GL091372. <https://doi.org/10.1029/2020GL091372>, 2021.
- Chepfer H., Bony, S., Winker, D., Chiriaco, M., Dufresne, J.-L., Sèze, G.: Use of CALIPSO lidar observations to evaluate the
- 715 cloudiness simulated by a climate model, *Geophys. Res. Lett.*, 35, L15704, doi:10.1029/2008GL034207, 2008.
- Chepfer H., Bony, S., Winker, D., Cesana, G., Dufresne, J.-L., Minnis, P., Stubenrauch, C. J., and Zeng, S.: The GCM Oriented Calipso Cloud Product (CALIPSO-GOCCP). *J. Geophys. Res.*, 115, D00H16, doi:10.1029/2009JD012251, 2010.
- Chepfer H., Cesana, G., Winker, D., Getzewich, B., and Vaughan, M.: Comparison of two different cloud climatologies derived from CALIOP Level 1 observations: the CALIPSO-ST and the CALIPSO-GOCCP, *J. Atmos. Ocean. Tech.*, 30(4), 725–744
- 720 doi:10.1175/JTECH-D-12-00057.1, 2013.
- Chepfer, H., Noël, V., Winker, D., and Chiriaco, M.: Where and when will we observe cloud changes due to climate warming?, *Geophys. Res. Lett.*, 41, 8387–8395, doi:10.1002/2014GL061792, 2014.
- Chepfer H., Noël, V., Chiriaco, M., Wielicki, B., Winker, D., Loeb, N., and Wood, R.: The potential of multi-decades space-born lidar to constrain cloud feedbacks, *J. Geophys. Res. Atmos.*, DOI:10.1002/2017JD027742, 2018.
- 725 Chepfer, H., Brogniez, H., and Noël, V.: Diurnal variations of cloud and relative humidity profiles across the tropics, *Sci. Rep.*, 9, 16045, doi:10.1038/s41598-019-52437-6, 2019.
- Chiriaco, M., Vautard, R., Chepfer, H., Haeffelin, M., Dudhia, J., Wanherdrick, Y., Morille, Y., and A. Protat, A.: The Ability of MM5 to Simulate Ice Clouds: Systematic Comparison between Simulated and Measured Fluxes and Lidar/Radar Profiles at the SARTA Atmospheric Observatory, *Monthly Weather Rev.*, 134(3), 897–918, <https://doi.org/10.1175/MWR3102.1>, 2006.



- 730 Davis, S. M. and Rosenlof, K.H.: A multidagnostic intercomparison of tropical-width time series using reanalyses and satellite observations, *J. Clim.*, 25: 1061-1078, 2012.
- do Carmo, J. P., Villele, de V., Wallace, K., Lefebvre, A., Ghose, K., Kanitz, T., Chassat, F., Corselle, B., Belhadj, T., Bravetti, P.: ATmospheric LIDar(ATLID): Pre-launch testing and calibration of the European Space Agency instrument that will measure aerosols and thin clouds in the atmosphere, *Atmosphere*, 12, 76. <https://doi.org/10.3390/atmos12010076>, 2021.
- 735 Donovan, D. P.: The Expected Impact of Multiple Scattering on ATLID Signals, *EPJ Conf.*, 119(1), 01006, doi: 10.1051/epjconf/201611901006, 2016.
- Durand, Y., Hélière, A., Bézy, J.-L., and Meynard, R.: The ESA EarthCARE mission: Results of the ATLID instrument pre-developments, *Proc.SPIE*, 6750, 675015, doi:10.1117/12.737932, 2007.
- Eyring, V., Bony, S., Meehl, G. A., Senior, C. A., Stevens, B., Stouffer, R. J., and Taylor, K. E.: Overview of the Coupled
- 740 Model Intercomparison Project Phase 6 (CMIP6) experimental design and organization, *Geosc. Mod. Devel.*, 9(5), 1937–1958. <https://doi.org/10.5194/gmd-91937-2016>, 2016.
- Feofilov, A. G., Stubenrauch, C. J., and Delanoë, J.: Ice water content vertical profiles of high-level clouds: Classification and impact on radiative fluxes. *Atmospheric Physics and Chemistry*, 15(21), 12327–12344. <https://doi.org/10.5194/acp-15-12327-2015>, 2015.
- 745 Feofilov, A. G. and Stubenrauch, C. J.: Diurnal variation of high-level clouds from the synergy of AIRS and IASI space-borne infrared sounders, *Atmos. Chem. Phys.*, 19, 13957–13972, <https://doi.org/10.5194/acp-19-13957-2019>, 2019.
- Feofilov, A. G., H. Chepfer, V. Noël, R. Guzman, C. Gindre, P.-L. Ma, and M. Chiriaco: Comparison of scattering ratio profiles retrieved from ALADIN/Aeolus and CALIOP/CALIPSO observations and preliminary estimates of cloud fraction profiles. *Atmos. Meas. Tech.*, 15, 1055–1074, <https://doi.org/10.5194/amt-15-1055-2022>, 2022.
- 750 Garnier, A., Pelon, J., Vaughan, M. A., Winker, D. M., Trepte, C. R., and Dubuisson, P.: Lidar multiple scattering factors inferred from CALIPSO lidar and IIR retrievals of semi-transparent cirrus cloud optical depths over oceans, *Atmos. Meas. Tech.*, 8(7), 2759–2774, <https://doi.org/10.5194/amt-8-2759-2015>, 2015.
- Guzman, R., Chepfer, H., Noël, V., Vaillant de Guelis, T., Kay, J. E., Raberanto, P., Cesana, G., Vaughan, M. A., and Winker, D. M.: Direct atmosphere opacity observations from CALIPSO provide new constraints on cloud-radiation interactions, *J.*
- 755 *Geophys. Res. Atmos.*, 122, 1066–1085, doi:10.1002/2016JD025946, 2017.
- Haynes, J. M., Marchand, R. T., Luo, Z., Bodas-Salcedo, A., and Stephens, G. L.: A multipurpose radar simulation package: QuickBeam, *Bull. Am. Meteorol. Soc.*, 88, 1723– 1727, doi:10.1175/BAMS-88-11-1723, 2007.
- Hélière, A., Gelsthorpe, R., Le Hors, L., and Toulemont, Y.: ATLID, the Atmospheric Lidar on board the EarthCARE Satellite, *Proceedings of the ICSO (International Conference on Space Optics)*, Ajaccio, Corse, France, Oct. 9-12, 2012, paper: ICSO-
- 760 065, 2012.
- Hogan, R. J., and Kew, S.F.: A 3D stochastic cloud model for investigating the radiative properties of inhomogeneous cirrus clouds, *Q. J. R. Meteorol. Soc.*, 131 (611), 2585-2608, doi 10.1256/qj.04.144, 2005.



- Hurrell, J. W., Holland, M. M., Gent, P. R., Ghan, S., Kay, J. E., Kushner, P. J., et al.: The Community Earth System Model: A Framework for Collaborative Research. *B. Amer. Meteor. Soc.*, 94(9), 1339–1360., 2013.
- 765 Illingworth, A.J. and 28 co-authors, The EarthCARE satellite: the next step forward in global measurements of clouds, aerosols, precipitation, and radiation, *Bull. Am. Meteorol. Soc.*, 96, 1311-1332, [10.1175/BAMS-D-12-00227.1](https://doi.org/10.1175/BAMS-D-12-00227.1), 2015.
- Kjellsson, J.: Weakening of the global atmospheric circulation with global warming, *Clim. Dyn.*, 45, 975–988, <https://doi.org/10.1007/s00382-014-2337-8>, 2015.
- Klein, S. A., and Jakob, C.: Validation and Sensitivities of Frontal Clouds Simulated by the ECMWF Model, *Monthly Weather Review*, 127(10), 2514-2531, [https://doi.org/10.1175/1520-0493\(1999\)127%3C2514:VASOFC%3E2.0.CO;2](https://doi.org/10.1175/1520-0493(1999)127%3C2514:VASOFC%3E2.0.CO;2), 1999.
- 770 Konsta, D., Chepfer, H., and Dufresne, J.-L.: A process oriented characterization of tropical oceanic clouds for climate model evaluation, based on a statistical analysis of daytime A-Train observations, *Clim. Dyn.*, 39(9-10), 2091–2108. <https://doi.org/10.1007/s00382012-1533-7>, 2012.
- Marchand, R., Haynes, J., Mace, G. G., Ackerman, T., and Stephens, G.: A comparison of simulated cloud radar output from the multiscale modeling framework global climate model with CloudSat cloud radar observations, *J. Geophys. Res.*, 114, D00A20, [doi:10.1029/2008JD009790](https://doi.org/10.1029/2008JD009790), 2009.
- 775 McGill, M. J., Yorks, J. E., Scott, V. S., Kupchock, A. W., and Selmer, P. A.: The Cloud-Aerosol Transport System (CATS): A technology demonstration on the International Space Station, *Proc. Spie.*, 9612, [doi:10.1117/12.2190841](https://doi.org/10.1117/12.2190841), 2015.
- Nam C., Bony, S., Dufresne, J.L., Chepfer, H.: The 'too few, too bright' tropical low-cloud problem in CMIP5 models, *J. Geophys. Res. Lett.*, 39, 21, [doi:10.1029/2012GL053421](https://doi.org/10.1029/2012GL053421), 2012.
- 780 Noël, V., Chepfer, H., Chiriaco, M., and Yorks, J.: The diurnal cycle of cloud profiles over land and ocean between 51° S and 51° N, seen by the CATS space-borne lidar from the International Space Station, *Atmos. Chem. Phys.*, 18, 9457–9473, [doi:10.5194/acp-18-9457-2018](https://doi.org/10.5194/acp-18-9457-2018), 2018.
- Perpina, M., Noel, V., Chepfer, H., Guzman, R., & Feofilov, A. G.: Link between opaque cloud properties and atmospheric dynamics in observations and simulations of current climate in the Tropics, and impact on future predictions. *J. Geophys. Res.: Atmospheres*, 126, e2020JD033899. <https://doi.org/10.1029/2020JD033899>, 2021.
- 785 Platt, C. M. R.: Lidar and radiometric observations of cirrus clouds, *J. Atmos. Sci.* 30, 1191–1204, 1973.
- Rasch, P., and 41 Coauthors: An Overview of the Atmospheric Component of the Energy Exascale Earth System Model, *J. Adv. Model. Earth Syst.*, *jame20932*, [doi:10.1029/2019MS001629](https://doi.org/10.1029/2019MS001629), 2019.
- 790 Reitebuch, O., and 27 Coauthors: Initial Assessment of the Performance of the First Wind Lidar in Space on Aeolus, *EPJ Web Conf.* 237, 01010, [doi:10.1051/epjconf/202023701010](https://doi.org/10.1051/epjconf/202023701010), 2020.
- Reverdy M., Chepfer, H., Donovan, D., Noël, V., Cesana, G., Hoareau, C., Chiriaco, M., Bastin, S.: An EarthCARE/ATLID simulator to evaluate cloud description in climate models, *J. Geophys. Res. Atmos.*, 120(21), 11090–11113, [doi: 10.1002/2015JD023919](https://doi.org/10.1002/2015JD023919), 2015.



- 795 Sassen, K., and Comstock, J.M.: A midlatitude cirrus cloud climatology from the facility for atmospheric remote sensing. Part III: Radiative properties *Journal of the Atmospheric Sciences*. 58: 2113-2127. DOI: 10.1175/1520-0469(2001)058<2113:Amcccf>2.0.Co;2, 2001.
- Schwalm C. R., Glendon, S., Duffy, P.B.: RCP85 tracks cumulative CO<sub>2</sub> emissions. *PNAS* 117 (33), 19656-19657. <https://doi.org/10.1073/pnas.2007117117>, 2020.
- 800 Shcherbakov, V., Szczap, F., Alkasem, A., Mioche, G., and Cornet, C.: Empirical model of multiple-scattering effect on single-wavelength lidar data of aerosols and clouds, *Atmos. Meas. Tech.*, 15, 1729–1754, <https://doi.org/10.5194/amt-15-1729-2022>, 2022.
- Stevens, B., H-Moeng, C., Ackerman A. S., Bretherton, C. S., Chlond, A., de Roode, S., Edwards, J., Golaz, J. C., Jiang, H., Khairoutdinov, M., Kirkpatrick, M. P., Lewellen, D. C., Lock, A. L., Müller, F., Stevens, D. E., Whelan, E., and Zhu, P.:
- 805 Evaluation of large-eddy simulations via observations of nocturnal marine stratocumulus, *Mon. Wea. Rev.*, 133, 1443–1462, 2005.
- Straume, A. G., and 27 Coauthors: ESA’s Space-Based Doppler Wind Lidar Mission Aeolus – First Wind and Aerosol Product Assessment Results, *EPJ Web Conf.* 237, 01007, doi:10.1051/epjconf/20202370100, 2020.
- Su, H., Jiang, J. H., Zhai, C., Shen, T. J., Neelin, J. D., Stephens, G. L., & Yung, Y. L: Weakening and strengthening structures
- 810 in the Hadley Circulation change under global warming and implications for cloud response and climate sensitivity: Circulation, Clouds, Climate Sensitivity. *Journal of Geophysical Research: Atmospheres*, 119(10), 5787–5805. <https://doi.org/10.1002/2014JD021642>, 2014.
- Swales, D. J., Pincus, R., & Bodas-Salcedo, A.: The cloud feedback model intercomparison project observational simulator package: Version 2. *Geoscientific Model Development*, 11, 77– 81, doi:10.5194/gmd-11-77-2018, 2018.
- 815 Szczap F., Gour, Y., Fauchez, T., Cornet, C., Faure, T., Jourdan, O., Penide, G., and Dubuisson, P.: A flexible three-dimensional stratocumulus, cumulus and cirrus cloud generator (3DCLOUD) based on drastically simplified atmospheric equations and Fourier transform framework, *GMD*, 7(4), 1779-1801, doi 10.5194/gmd-7-1779-2014, 2014.
- Takahashi, H., M. D. Lebsock, M. Richardson, R. Marchand, and J. E. Kay: When Will Spaceborne Cloud Radar Detect Upward Shifts in Cloud Heights? *J. Geophys. Res. Atmos.*, 2018JD030242, <https://doi.org/10.1029/2018JD030242>, 2019.
- 820 Vaillant de Guélis, T., Chepfer, H., Noel, V., Guzman, R., Dubuisson, P., Winker, D. M., and Kato, S.: The link between outgoing longwave radiation and the altitude at which a spaceborne lidar beam is fully attenuated. *Atmospheric Measurement Techniques*, 10(12), 4659–4685. <https://doi.org/10.5194/amt-10-4659-2017>, 2017.
- Vaillant de Guélis T., H. Chepfer, Noël, V., Guzman, R., Bonazzola, M., and Winker, D. M.: Space lidar observations constrain longwave cloud feedback, *Nature Sci. Rep.*, 8:16570, doi:10.1038/s41598-018-34943-1, 2018.
- 825 Waliser, D., and 20 co-authors: Observations for Model Intercomparison Project (Obs4MIPs): status for CMIP6, *Geosci. Model Dev.*, 13, 2945–2958, <https://doi.org/10.5194/gmd-13-2945-2020>, 2020.



- Winker, D. M., Vaughan, M. A., Omar, A. H., Hu, Y., Powell, K. A., Liu, Z., Hunt, W. H., and Young, S. A.: Overview of the CALIPSO Mission and CALIOP Data Processing Algorithms, *J. Atmos. Ocean. Tech.*, 26, 2310–2323, doi:10.1175/2009JTECHA1281.1, 2009.
- 830 Winker, D., Chepfer, H., Noël, V., and Cai, X.: Observational constraints on cloud feedbacks: The role of active satellite sensors. *Surveys in Geophysics*, 38, 1483–1508, <https://doi.org/10.1007/s10712-017-9452-0>, 2017.
- Zelinka, M. D., Klein, S. A., & Hartmann, D. L.: Computing and Partitioning Cloud Feedbacks Using Cloud Property Histograms. Part II: Attribution to Changes in Cloud Amount, Altitude, and Optical Depth. *J. of Climate*, 25(11), 3736–3754. <https://doi.org/10.1175/JCLI-D-11-00249.1>, 2012.
- 835 Zelinka, M. D., Zhou, C., & Klein, S. A.: Insights from a refined decomposition of cloud feedbacks. *Geophys. Res. Lett.*, 43(17), 9259–9269. <https://doi.org/10.1002/2016GL069917>, 2016.
- Zelinka, M. D., Myers, T. A., McCoy, D. T., Po-Chedley, S., Caldwell, P. M., Ceppi, P., et al.: Causes of higher climate sensitivity in CMIP6 models, *Geophys. Res. Lett.*, 47, e2019GL085782. <https://doi.org/10.1029/2019GL085782>, 2020.
